1 **WNK1 regulates uterine homeostasis and its ability to support pregnancy**

2 Ru-pin Alicia Chi<sup>1</sup>, Tianyuan Wang<sup>2</sup>, Chou-Long Huang<sup>3</sup>, San-pin Wu<sup>1</sup>, Steven Young<sup>4</sup>, John  
3 Lydon<sup>5</sup>, and Francesco DeMayo<sup>1</sup>

4

5 <sup>1</sup> Reproductive and Developmental Biology Laboratory, National Institute of Environmental  
6 Health Sciences, Durham, NC, 27709, USA

7 <sup>2</sup> Integrative Bioinformatics Support Group, National Institute of Environmental Health Sciences,  
8 Durham, NC, 27709, USA

9 <sup>3</sup> Department of Internal Medicine, University of Iowa Carver College of Medicine, Iowa, IA,  
10 52242, USA

11 <sup>4</sup> Department of Obstetrics and Gynecology, University of North Carolina at Chapel Hill, Chapel  
12 Hill, NC, 27599, USA

13 <sup>5</sup> Department of Molecular and Cellular Biology, Baylor College of Medicine, Houston, TX,  
14 77030, USA

15

16 **Conflict of interest statement:**

17 The authors have declared that no conflict of interest exists.

18

19 **Correspondence to:**

20 Francesco DeMayo  
21 National Institute of Environmental Health Sciences  
22 111 T.W. Alexander Drive  
23 P.O. Box 12233, Mail Drop B2-3  
24 Research Triangle Park, NC 27709  
25 Ph: (984)-287-3987  
26 Email: francesco.demayo@nih.gov

27

28 **Keywords:**

29 WNK1, reproduction, implantation, AKT, PP2A, FOXO1, adenomyosis, hyperplasia

30

31 **Abstract**

32

33 WNK1 is an atypical kinase protein ubiquitously expressed in humans and mice. A  
34 mutation in its encoding gene causes hypertension in humans which is associated with  
35 abnormal ion homeostasis. Our earlier findings demonstrated that WNK1 is critical for *in*  
36 *vitro* decidualization in human endometrial stromal cells – pointing towards an  
37 unrecognized role of WNK1 in female reproduction. Here, we employed a mouse model  
38 with conditional WNK1 ablation from the female reproductive tract to define its *in vivo* role  
39 in uterine biology. Loss of WNK1 altered uterine morphology, causing endometrial  
40 epithelial hyperplasia, adenomyosis and a delay in embryo implantation, ultimately  
41 resulting in compromised fertility. Combining transcriptomic, proteomic and interactomic  
42 analyses revealed a novel regulatory pathway whereby WNK1 represses AKT  
43 phosphorylation through the phosphatase PP2A in endometrial cells from both humans  
44 and mice. We show that WNK1 interacts with PPP2R1A, an isoform of the PP2A scaffold  
45 subunit. This interaction stabilizes the PP2A complex, which then dephosphorylates AKT.  
46 Therefore, loss of WNK1 reduced PP2A activity, causing AKT hypersignaling. Using  
47 FOXO1 as a readout of AKT activity, we demonstrate that there was escalated FOXO1  
48 phosphorylation and nuclear exclusion, leading to a disruption in the regulation of genes  
49 that are crucial for embryo implantation.

50

51

## 52 Introduction

53

54 The ability of the uterus to support and maintain the development of an embryo is critically  
55 dependent upon the process of implantation, the aberrant occurrence of which causes a ripple  
56 effect leading to pregnancy complications and miscarriage (1). Embryo implantation occurs during  
57 the “window of receptivity” and requires a fully prepared and receptive uterus. Investigation of  
58 uterine function mediators during receptivity identified with no lysine(k) kinase (K) 1 (WNK1) as  
59 functional in the uterus acting downstream of EGFR, whose inhibition impaired decidualization  
60 (2). Functional analysis of human endometrial stromal cells *in vitro* demonstrated that WNK1 is  
61 needed for proliferation, migration and differentiation (3). Collectively, these findings indicate a  
62 previously unrecognized function of WNK1 in the female reproductive tract and led us to  
63 hypothesize that WNK1 is a mediator of uterine function.

64

65 WNK1 belongs to a family of serine/threonine protein kinases (4, 5), with its name derived from  
66 the unusual placement of the catalytic lysine in subdomain I (6). To date, Wnk1’s function is the  
67 most extensively explored in the kidney and the nervous system due to the link between its  
68 mutation and familial hypertension and autonomic neuropathy (7-9). In the renal system, WNK1  
69 controls ion homeostasis through diverse mechanisms including activation of the SGK1/epithelial  
70 sodium channel pathway (10), regulating the potassium channel Kir1.1 cell surface localization  
71 (11), as well as controlling the activity of Na-K-Cl cotransporter through phosphorylating  
72 OSR1(OXSR1) and SPAK (12, 13). Interestingly, WNK1’s regulatory function on OSR1 is critical  
73 for cardiovascular development, thereby contributing to embryonic lethality when WNK1 is ablated  
74 from the endothelium (14, 15). These findings suggest that although WNK1 exhibits organ-specific

75 physiological functions, the underlying cellular components regulated by WNK1 may share  
76 similarity between the different tissues.

77

78 Despite its ubiquitous expression pattern, WNK1's role in organs other than those described  
79 above remain unexplored. Given the role of WNK1 in regulating uterine stromal cell biology *in*  
80 *vitro*, we hypothesized that WNK1 is essential in regulating uterine functions. To test this idea, we  
81 established a conditional uterine WNK1 ablated mouse model, which resulted in severely  
82 compromised fertility. We demonstrate that WNK1 is critical in maintaining uterine morphology,  
83 regulating epithelial proliferation and permitting appropriate embryo implantation. Transcriptomic  
84 and proteomic analyses identified deregulation of the AKT signaling pathway underlying the  
85 observed phenotypes. Using cultured human endometrial cells, we conducted a series of  
86 functional analyses to tease out the signaling hierarchy involving WNK1, PP2A, AKT and FOXO1.

87

## 88 RESULTS

89

### 90 ***WNK1 is expressed in the uterus during early pregnancy in both humans and mice***

91 WNK1 expression was examined by immunohistochemistry in human endometrium during the  
92 proliferative and mid-secretory phases as well as in the peri-implantation uterus of mice. In  
93 humans, WNK1 is expressed in both the epithelial and stromal cells during the proliferative and  
94 mid-secretory phases (Fig. 1.A). Similarly in mice, WNK1 is expressed during and after  
95 implantation on gestation days (GDs) 4.5 and 5.5 (Fig. 1.B). These findings support the *in vivo*  
96 involvement of WNK1 in regulating functions of the female reproductive tract.

97

### 98 ***WNK1 ablation altered uterine morphology and microenvironment***

99 To examine WNK1's function in the female reproductive tract, we established a mouse model with  
100 WNK1 ablation in progesterone receptor (PGR) expressing cells, which comprised all cellular  
101 compartments of the uterus. The conditional *Wnk1* allele mice (*Wnk1<sup>fl/fl</sup>*) were crossed to the  
102 *PGR<sup>Cre</sup>* mice (14, 16), and confirmed that in the *PGR<sup>Cre/+</sup>;Wnk1<sup>fl/fl</sup>* offspring (*Wnk1<sup>d/d</sup>*), Cre mediated  
103 excision led to the removal of exon 2 (Fig. S1.A and S1.B). Analysis of protein expression in  
104 uterine tissue via western blot confirmed reduced WNK1 protein levels in the *Wnk1<sup>d/d</sup>* mice (Fig.  
105 S1.C), indicating that exon 2 excision led to reduced total protein levels.

106

107 We employed a tissue clearing technique to visualize uterine morphology in 3D during the window  
108 of receptivity (Fig. 2.A) (17). WNK1 deficiency substantially impacted uterine morphology,  
109 exhibiting increased number of, as well as altered structure of the endometrial glands (Fig. 2.A).  
110 Among the abnormalities observed in the *Wnk1<sup>d/d</sup>* uteri was the failure of gland reorientation

111 surrounding the embryo (18, 19). This is seen in the *Wnk1<sup>ff</sup>* uteri where glands near the embryo  
112 exhibited a elongated structure while glands away from the embryo remained tortuous and  
113 intertwined. In the *Wnk1<sup>d/d</sup>* uteri, the glands appears equally tortuous irrespective of distance  
114 from embryo (Fig. 2.A). Examination of uterine cross sections from older mice (26 and 50 weeks)  
115 further demonstrated invasion of glands into the myometrium, suggesting that WNK1 ablation  
116 caused adenomyosis (Fig. 2.B). This was supported by the elevated expression of *Moesin (Msn)*  
117 in the *Wnk1<sup>d/d</sup>* uteri, a biomarker for adenomyosis in humans (Fig. 2.C) (20). Quantification of  
118 gland number and *Foxa2* gene expression showed significant elevation in the *Wnk1<sup>d/d</sup>* uteri (Fig.  
119 2.D and E), confirming the substantial increase in glandular tissues. To examine whether the  
120 increased glands were a result of increased proliferation in the uterus, we examined the  
121 expression of two mitotic markers - cyclin D1 (CCND1) and phosphorylated histone H3 (H3S10p).  
122 Elevated levels of both proteins in the glandular epithelial cells of the *Wnk1<sup>d/d</sup>* uteri was observed  
123 (Fig. 2.F). In addition to the increased CCND1 and H3S10p in the glandular epithelium, higher  
124 expression of both proteins was also observed in the luminal epithelium of *Wnk1<sup>d/d</sup>* uteri  
125 demonstrating that WNK1 ablation induced epithelial hyperplasia was not restricted to the glands.  
126 Moreover, we observed increased extracellular matrix deposition especially surrounding the  
127 glands in the *Wnk1<sup>d/d</sup>* uteri, as shown by Masson's trichrome staining (Fig. 2.G). These results  
128 suggest that the adenomyotic phenotype could be associated with increased epithelial  
129 proliferation as well as excessive extracellular matrix deposition (21, 22).

130

### 131 ***Uterine loss of WNK1 impaired implantation***

132 A six month breeding trial was conducted to determine the impact of WNK1 ablation on female  
133 fertility. Of the 8 control mice, 7 were able to complete the breeding trial, with 1 found dead  
134 midtrial. Necropsy showed neither pregnancy nor abnormality associated with the reproductive  
135 tract in this one mouse, indicating that the cause of death was not related to abnormal uterine

136 function. The 7 mice produced 31 litters totaling 245 pups, which was equivalent to 4.4 litters and  
137 35 pups per mouse during the 6 months (Fig. 3.A). In contrast, only 4 of the 8  $Wnk1^{d/d}$  mice  
138 initiated in the trial were able to complete the trial. This was due to 4 females succumbing to  
139 complications during pregnancy or delivery. Of those, 2 had been found dead near term each  
140 carrying 2 pups, 1 was in dystocia and had to undergo euthanization, from which 5 pups were  
141 recovered. One was found ill and necropsy showed utero-abdominal fistula. Of the 4 females that  
142 completed the trial, 10 litters and 18 pups were produced, which averaged to 2.5 litters and 4.5  
143 pups per mouse (Fig. 3.A). The average litter size was also significantly smaller, averaging 3.3  
144 pups per litter in the  $Wnk1^{d/d}$  mice, compared to 7.7 in the control  $Wnk1^{ff}$  mice (Fig. 3.B). While  
145 the  $Wnk1^{ff}$  mice bred consistently, producing the last litters in the twentieth week of the trial, most  
146 of the  $Wnk1^{d/d}$  mice stopped breeding after 3 litters less than 15 weeks into the trial, with only one  
147 mouse producing after the twentieth week (Fig. 3.C). Taken together, these results illustrated  
148 compromised ability to support pregnancy and premature sterility with uterine loss of WNK1.

149

150 We next examined whether the subfertile phenotype was associated with an implantation defect  
151 in the  $Wnk1^{d/d}$  mice. Dams were euthanized on GD 4.5, and embryo implantation was visualized  
152 by Evan's blue dye staining. As expected, 84.2% of the control mice successfully permitted  
153 embryo implantation on GD 4.5 while the remaining 15.8% had no embryos present in the uterus  
154 as indicated by uterine flushing (Fig. 3.D, top panel and Fig. 3.E). On the other hand, significantly  
155 fewer (29.4%;  $p = 0.0019$ ) of the mated  $Wnk1^{d/d}$  mice were able to form implantation sites on GD  
156 4.5; however, 52.9% of the mice harboured fertilized embryos inside the uterus as identified by  
157 uterine flushing (Fig. 3.D, top panel and Fig. 3.E). Examination of the uterus on GD 5.5 showed  
158 76.9% of the  $Wnk1^{d/d}$  mice with implantation sites which is, at this time point, comparable to their  
159  $Wnk1^{ff}$  control littermates (Fig. 3.D, bottom panel). Histological examination showed that the  
160 control  $Wnk1^{ff}$  mice had already degraded the epithelium, enabling the embryo to invade the

161 underlying stroma (Fig. 3.F, left), while  $Wnk1^{d/d}$  uteri had intact maternal epithelium at this time  
162 point with the embryo trapped inside the luminal space (Fig. 3.F). These findings demonstrate  
163 that in the  $Wnk1^{d/d}$  mice, implantation can still occur, but is severely delayed in comparison to  
164  $Wnk^{ff}$  mice.

165

166 In addition to the uterine expression, PGR is also expressed in the ovaries and pituitary, hence  
167 WNK1 was also ablated from those tissues. We next questioned whether the implantation  
168 phenotype could be attributed to a dysfunction of the ovary. Ovarian function was evaluated by  
169 assaying ovulation and ovarian steroid hormone levels. The mice were subjected to  
170 superovulatory regimen of gonadotropins, followed by mating to wildtype male mice, and  
171 euthanized on GD 1.5 to simultaneously monitor fertilization of the oocytes. We found a mild  
172 decrease albeit non-significant decrease in the number of 2-cell embryos produced by the  $Wnk1^{d/d}$   
173 dams indicating that ovulation and fertilization was not affected (Fig. S2.A). Additionally, serum  
174 estradiol ( $E_2$ ) and progesterone ( $P_4$ ) levels were similar between the  $Wnk1^{ff}$  and  $WNK1^{d/d}$  mice  
175 on GD 4.5 (Fig. S2.B and C), demonstrating that the ovaries were able to produce and maintain  
176 hormone levels. These results indicate that the main contributing factor for the delayed  
177 implantation was not a malfunction of the ovary.

178

179 Prerequisites for uterine receptivity are the production of leukemia inhibitory factor (LIF) from the  
180 uterine glands and the cessation of epithelial proliferation prior to implantation on GD 3.5 (23, 24);  
181 as well as suppression of epithelial PGR expression during implantation on GD 4.5 (25). Hence,  
182 we examined the uterus to see whether the delayed implantation was associated with impairment  
183 of those parameters. *Lif* gene expression on GD 3.5 was similarly induced in the  $Wnk1^{ff}$  and  
184  $Wnk1^{d/d}$  mice, which decreased to basal level on GD 4.5 in the  $Wnk1^{ff}$  mice (Fig. 3.G). The



185 Wnk1<sup>d/d</sup> mice showed higher *Lif* levels on GD 4.5 (Fig. 3.G), however, this is unlikely to impact  
186 implantation. In the control mice, there was little to no expression of Ki-67 and PGR in the luminal  
187 epithelium on GD 4.5, as expected (Fig. 3.H). The Wnk1<sup>d/d</sup> mice, however, maintained the  
188 expression of both proteins during the window of implantation (Fig. 3.G), indicating that there was  
189 a failure to impede epithelial proliferation. These findings illustrated that crucial implantation-  
190 associated molecular events were deregulated in the Wnk1<sup>d/d</sup> mice.

191

### 192 ***Abnormal embryo development and increased resorption in Wnk1<sup>d/d</sup> mice***

193 Interestingly, of the 29.4% mated Wnk1<sup>d/d</sup> mice that were able to permit embryo implantation on  
194 time (GD 4.5), the number of implantation sites were similar to their Wnk1<sup>ff</sup> control littermates  
195 (Fig. 4.A). However, the number of implantation sites present on GD 5.5 was significantly lower  
196 in the Wnk1<sup>d/d</sup> mice (Fig. 4.B and C). This finding indicated that the delay in implantation is  
197 associated with reduced number of implantation sites. Additionally, spacing between the  
198 implantation sites in the Wnk1<sup>d/d</sup> mice were irregular whereas the implantation sites observed in  
199 the Wnk1<sup>ff</sup> mice were evenly distributed (Fig. 4.C). This is supported by a significant increase in  
200 the standard deviation of inter-implantation sites distance in Wnk1<sup>d/d</sup> uteri compared to Wnk1<sup>ff</sup>  
201 uteri (Fig. 4.D). Interestingly, for the Wnk1<sup>d/d</sup> mice that were able to implant promptly, implantation  
202 spacing was more evenly distributed (Fig. 3.E), suggesting that the delay may impact both  
203 implantation numbers and spacing. Examination of the uterus and embryo during mid-pregnancy  
204 (GD 8.5) further demonstrated that the Wnk1<sup>d/d</sup> mice carried either resorbed embryos (Fig. 4.E,  
205 middle panel) or abnormally formed decidual balls (Fig. 4.E, right panel), compared to the  
206 normally sized decidual balls observed in the control mice (Fig. 4.E, left panel). Moreover, we also  
207 observed multiple embryos within one decidual zone (Fig. 4.E, right panel), possibly from the  
208 cluttered/delayed implantation. Morphology was evaluated by examining cross sections through  
209 the center of the decidual ball, which showed that the Wnk1<sup>ff</sup> mice have vascularized and initiated

210 placentation (Fig. 4.F, black arrows and dashed lines, respectively), both of which were lacking in  
211 the *Wnk1<sup>d/d</sup>* uteri. While this could be associated to delay in embryo development, it should not  
212 be ruled out that this may be a phenotype associated with the endothelial inhibition of WNK1  
213 expression, as WNK1 is also known to function in endothelial cells (14, 26). Ultrasound scans  
214 demonstrated decreased gestation sac size (Fig. 4.G and H) and decreased embryo size at both  
215 GD 8.5 and GD 10.5 (Fig. 4.G and I). By GD 12.5, embryo resorption was frequently observed in  
216 the *Wnk1<sup>d/d</sup>* mice (Fig. 4.G, bottom panel). Collectively, these findings demonstrate that uterine  
217 WNK1 ablation led to abnormal implantation and negatively impacted embryo development,  
218 resulting in the compromised pregnancy outcome and subfertility.

219

#### 220 ***Loss of uterine WNK1 elevated AKT signaling***

221 To fully characterize the molecular mechanisms underlying the loss of WNK1 induced-  
222 implantation defect, we next examined global gene expression profile by RNA sequencing (RNA-  
223 seq) in the uterus during receptivity. To ensure that the analysis was conducted only on the  
224 maternal uterine tissues and not the embryos, we used vasectomized wild-type males to induce  
225 pseudopregnancy in the *Wnk1<sup>fl/fl</sup>* and *Wnk1<sup>d/d</sup>* mice, which was confirmed by serum progesterone  
226 levels on pseudopregnancy day (PPD) 4.5 (Table S1). In total, there were 14,423 and 14,337  
227 genes expressed in the *Wnk1<sup>fl/fl</sup>* and *Wnk1<sup>d/d</sup>* uterus, respectively; of which 14,024 were expressed  
228 in both. The transcriptomes were subjected to principle component analysis (PCA) as a measure  
229 of quality control, which segregated according to genotype indicating that the samples were well-  
230 characterized by genotype (Fig. S3). Using a defining threshold of *q*-value under 0.05 for  
231 significance and fold change (FC) over 1.5 as differential expression, we identified 1,727  
232 significantly and differentially expressed genes (DEGs) in the *Wnk1<sup>d/d</sup>* uterus during receptivity  
233 (Table S2). We then conducted detailed analyses to characterize the molecular alterations  
234 associated with uterine *Wnk1* ablation using the Database for Annotation, Visualization and

235 Integrated Discovery (DAVID) bioinformatic database and Ingenuity Pathway Analysis (IPA). The  
236 top biological processes associated with the DEGs were adhesion, cell movement and  
237 locomotion, inflammation and blood vessel development (Table S3). Many important molecular  
238 functions associated with implantation were also deregulated in the *Wnk1<sup>d/d</sup>* uteri, such as cell  
239 proliferation and apoptosis, Notch signaling, cell differentiation, epithelial to mesenchymal  
240 transition (EMT), cytokine production, and response to estrogen. Prediction of upstream regulator  
241 activity further showed altered activity for many important receptivity mediators, including the  
242 suppression of JAG, HEY2, PTEN and SERPINE1 (Fig. 5.A). On the other hand, TGFB1, ERBB2,  
243 AKT, estrogen, ERK, MUC1 and KLF5 were predicted to show increased activity (Fig. 5.A, for the  
244 complete list see Table S4). As WNK1 is a kinase, we next examined the alterations in the kinase  
245 phosphorylation network to understand the impact of WNK1 ablation. To this end, we employed  
246 an image-based phosphokinase array to simultaneously evaluate the phosphorylation status of  
247 multiple kinases in the uterus during receptivity (Fig. 5.B and C). Loss of WNK1 altered the  
248 phosphorylation of various kinases, including TOR (mTOR), SRC, PRAS40 (AKT1S1), JNK,  
249 AMPK $\alpha$ 1 (PRKAA1), GSK-3 $\alpha/\beta$  (GSK3A and GSK3B) and AKT (Fig. 5.B and C, all kinases with  
250 > 2 fold change in phosphorylation are shown in Fig. S4.A). The phosphorylation of AKT, GSK-  
251 3 $\alpha/\beta$  and PRAS40 were independently validated via western blotting (Fig. S4.B) and all showed  
252 elevated phosphorylation in *Wnk1<sup>d/d</sup>* uteri during receptivity. Interestingly, AKT was identified as  
253 an activated upstream regulator by IPA, and the phosphokinase array demonstrated its elevated  
254 phosphorylation in the *Wnk1<sup>d/d</sup>* uteri during receptivity (Fig. 5.B, C and Fig. S4.B). Furthermore,  
255 elevated AKT phosphorylation on GD 4.5 was confirmed in both the epithelium and the stroma  
256 (Fig. 5.D). Indeed, we found that in the control mice, phosphorylation of AKT was actively  
257 suppressed as the mice transitioned into the receptive phase from GD 3.5 to PPD 4.5, however,  
258 the *Wnk1<sup>d/d</sup>* mice maintained high AKT phosphorylation both prior to and during receptivity (Fig.  
259 5.E).

260

261 We have shown earlier that implantation is compromised in the *Wnk1<sup>d/d</sup>* mice, and the AKT-  
262 regulated transcription factor FOXO1 is an indispensable mediator of implantation, as mice  
263 lacking uterine FOXO1 expression suffer infertility due to failed implantation (27). Interestingly,  
264 AKT is known to exert an inhibitory effect on FOXO1 transcriptional activity via directly  
265 phosphorylating it, resulting in its nuclear exclusion (28, 29). To examine whether loss of WNK1  
266 is impairing implantation through AKT and FOXO1, we examined FOXO1 expression using  
267 immunohistochemistry, and found that indeed, there was a marked decrease in its nuclear form  
268 in both the luminal epithelium and underlying stroma (Fig. 4.F). This is further confirmed by the  
269 increase in the levels of phosphorylated FOXO1 in the *Wnk1<sup>d/d</sup>* uteri (Fig. 4.G). As FOXO1 nuclear  
270 exclusion prevents its transcriptional activity, we compared WNK1-regulated genes and FOXO1-  
271 regulated genes in the uterus during the receptive phase (27). This revealed that roughly half of  
272 the FOXO1-regulated genes are also deregulated in *Wnk1<sup>d/d</sup>* uteri (Fig. 5.H), and strikingly, 90%  
273 of those genes were deregulated in the same direction under WNK1 and FOXO1 deficient  
274 conditions – these included known implantation and decidualization associated genes such as  
275 *Msx2*, *Wnt5a* and *Muc1* (Fig. 5. I, table S2, and Vasequez *et al.*, 2018 (27, 30-32)). These findings  
276 indicate that uterine loss of WNK1 led to elevated AKT phosphorylation and signaling, which was  
277 evident through the increased FOXO1 phosphorylation and nuclear exclusion. This in turn, led to  
278 deregulation of FOXO1-regulated genes during receptivity. Additionally, it appears that the impact  
279 of WNK1 on both AKT and FOXO1 is maintained in the same way in both the epithelial and  
280 stromal compartments, as both responded similarly to WNK1 deficiency.

281

282 ***WNK1 regulates FOXO1 localization via AKT, which is associated with decreased PP2A***  
283 ***expression and activity***

284 Having demonstrated that the loss of WNK1 led to increased phosphorylation of AKT and FOXO1  
285 in mouse uteri, we next examined whether this regulatory axis was similarly maintained in human  
286 endometrial HEC1A (epithelial) and THESC (stromal) cells. Using small interfering RNA against  
287 *WNK1* (siWNK1), WNK1 protein expression was inhibited, which robustly induced AKT and  
288 FOXO1 phosphorylation in both cell lines (Fig. 6.A). In order to test whether AKT facilitated  
289 FOXO1 localization downstream of WNK1, we next treated these cells with an AKT inhibitor,  
290 GDC0941, and examined whether it could rescue WNK1 ablation-induced phosphorylation and  
291 nuclear exclusion of FOXO1. FOXO1 localization clearly decreased in the nucleus of both cells  
292 after transfection with siWNK1 (Fig. 6.B, panels 1 VS 2, and 4 VS 5). However, when the siWNK1  
293 transfected cells were treated with GDC0941, nuclear FOXO1 was readily restored (Fig. 6.B,  
294 panels 3 and 6). This suggested that WNK1 inhibition-induced nuclear exclusion of FOXO1 is  
295 mediated through AKT. This is further supported by the findings that AKT inhibition rescued WNK1  
296 knock-down induced FOXO1 phosphorylation (Fig. 6.C). Interestingly, GDC0941 treatment  
297 reduced the phosphorylation of AKT and FOXO1 to a level that is lower than seen in the siCTRL  
298 transfected, untreated cells (considered basal level). As GDC0941 inhibits AKT through its  
299 upstream regulator PI3K (33), it is likely that PI3K lies upstream of WNK1 in regulating AKT.  
300 Indeed, none of the PI3K family members were impacted by WNK1 inhibition, including p110- $\alpha$ ,  
301 p110- $\beta$ , p110- $\gamma$ , Tyr458 phosphorylated p85 and Tyr199 phosphorylated p55 (Fig. 6.C). Similarly  
302 in mice, the expression of these proteins in the uterus were comparable between the *Wnk1<sup>ff</sup>* and  
303 *Wnk1<sup>d/d</sup>* mice during receptivity (Fig. 6.D).

304

305 We then explored the possible mechanisms through which WNK1 could regulate AKT  
306 phosphorylation and activity. A search of the upstream regulators predicted by IPA identified  
307 several candidates with altered activities in the *Wnk1<sup>d/d</sup>* uteri, including PTEN, PPP2CA, and  
308 sirolimus (rapamycin, Table S4). PTEN and PPP2CA are both phosphatases that regulate AKT

309 phosphorylation, and both displayed repressed activities in the *Wnk1<sup>d/d</sup>* mice during receptivity (Z-  
310 scores of -2.079 and -1.195, respectively, Table S4). Sirolimus, on the other hand, is a drug  
311 targeting the kinase mTOR, which was strongly inhibited (Z-score of -2.95, Table S4). We found  
312 that mTOR phosphorylation and PP2A subunits A and C were altered in the *Wnk1<sup>d/d</sup>* mice, while  
313 PTEN level was not significantly different (Fig. 6.E). This finding suggested that increased AKT  
314 phosphorylation in the *Wnk1<sup>d/d</sup>* mice may be mediated through elevated mTOR or repressed  
315 PP2A activity. As mTOR is both a regulator and a substrate of AKT (34, 35), we examined whether  
316 WNK1 ablation-induced AKT phosphorylation is mediated through mTOR. We inhibited mTOR  
317 activity using rapamycin and examined AKT/FOXO1 phosphorylation as well as FOXO1  
318 localization as a readout of AKT activity. As shown in Fig. S5.A, rapamycin treatment did not  
319 reverse the nuclear exclusion of FOXO1 induced by WNK1 inhibition. Additionally, AKT and  
320 FOXO1 phosphorylation was not rescued by rapamycin treatment (Fig. S5.B). Similar results were  
321 observed in HEC1A cells where WNK1 and mTOR double knock-down failed to rescue AKT and  
322 FOXO1 phosphorylation (Fig. S5.C). Thus, mTOR is likely not the WNK1 mediator controlling  
323 AKT activity, and its elevated phosphorylation is a result of elevated AKT activity, rather than its  
324 cause.

325

### 326 ***WNK1 regulates AKT phosphorylation through direct interaction with PPP2R1A***

327 So far, we have shown that WNK1 ablation led to subfertility in mice which is associated with an  
328 array of abnormalities including impaired implantation, altered morphology, epithelial hyperplasia  
329 and adenomyosis. Upstream regulator prediction and validation experiments identified elevated  
330 AKT phosphorylation in the *Wnk1<sup>d/d</sup>* uteri. This elevation was demonstrated to have functional  
331 consequences, evident through the deregulated FOXO1 transcriptional activity. In addition, there  
332 was a concomitant repression of the negative AKT regulator, PP2A. We explored the possible  
333 regulatory link between WNK1 and PP2A/AKT using a non-biased WNK1 immunoprecipitation-

334 mass spectrometry (IP-MS) approach to identify WNK1 binding partners. Successful WNK1 IP  
335 was confirmed by examining the lysate for WNK1 expression after immunoprecipitation using a  
336 rabbit IgG (negative control) or WNK1 targeting antibody from HEC1A cells (Fig. S6), and the  
337 peptides identified by mass-spectrometry are listed in Table S5. Amongst those were peptides  
338 belonging to WNK1 itself, as well as a known WNK1 substrate, oxidative stress responsive kinase  
339 1 (OXSR1/OSR1) (12), confirming the validity of the pull-down results (Table S5).

340

341 Putative WNK1 binding proteins identified in this experiment included Wnt regulators (OFD1 and  
342 CCDC88C), chromosome modulating and DNA repair proteins (SMCA1, KIF11, FANCI, RAD50  
343 and SLC25A5), proteins associated with the endoplasmic reticulum and ribosomal functions  
344 (UGGT1, SEC23A, HYOU1, EMC1, AIFM1, HM13, SCFD1) as well as the mitochondria (AIFM1,  
345 SLC25A5). Of particular interest were the components of protein phosphatase complexes PP2A  
346 (PPP2R1A) and PP6 (PPP6R3), as both regulate AKT signaling (36, 37). Since the enzymatic  
347 activity of PP2A was predicted by IPA as repressed in the *Wnk1<sup>d/d</sup>* mice during receptivity  
348 (PPP2CA, Table S4), we postulated that these observations were associated with the interaction  
349 between WNK1 and PPP2R1A, the alpha isoform of the scaffold subunit A of PP2A. In order to  
350 confirm the interaction of WNK1 and PPP2R1A, a YFP-tagged WNK1 (c4161, Fig. S7) was  
351 expressed in HEC1A cells, then immunoprecipitated using a YFP nanobody, followed by detection  
352 for PPP2R1A in the pulldown. We first confirmed that c4161 transfection induced exogenous  
353 WNK1 expression when compared to the control cells transfected with YFP only expressing  
354 construct (cYFP, Fig. 7.A). WNK1 was subsequently detected in the lysate immunoprecipitated  
355 for YFP (Fig. 7.B, upper panel), which co-immunoprecipitated with PPP2R1A (Fig. 7.B, middle  
356 panel).

357



358 Having confirmed the WNK1-PPP2R1A interaction, we next explored the biological implications  
359 of this interaction. The PP2A phosphatase complex is comprised of the scaffold subunit A with 2  
360 isoforms, the regulatory subunit B with 13 isoforms and the enzymatic subunit C with 2 isoforms.  
361 As shown earlier, uterine WNK1 ablation led to decreased protein levels of subunits A and C (Fig.  
362 6.E), yet RNA-seq showed no alteration in transcription of the 4 genes encoding these 2 subunits  
363 (*Ppp2ca*, *Ppp2cb*, *Ppp2r1a* and *Ppp2r1b*) in the *Wnk1<sup>d/d</sup>* mice. It has been reported that the  
364 stability of the PP2A subunits depends on their association with each other (38). Hence, reduced  
365 subunit levels could be an indication that the complexing capacity of the subunits were reduced  
366 in the absence of WNK1, leading to their degradation. We therefore postulated that the WNK1-  
367 PPP2R1A interaction is necessary for the association of the PP2A subunits. To test this idea, we  
368 examined the levels of PPP2R1A, total PP2A subunit A and total PP2A subunit C in WNK1 knock-  
369 down HEC1A cells, and accordingly found their reduced levels upon WNK1 inhibition (Fig. 7.C).  
370 Lastly, to validate that PP2A mediates AKT/FOXO1 signaling, we inhibited PPP2R1A expression  
371 in HEC1A cells using siRNA, and examined the components of the PP2A-AKT-FOXO1 signaling  
372 axis. As expected, PPP2R1A knock-down caused a reduction in total subunits A and C of PP2A  
373 (Fig. 7.D). Interestingly, AKT phosphorylation was selectively induced on threonine 308, but not  
374 serine 473 after PPP2R1A knock-down (Fig. 7.D). This nonetheless, translated to elevated  
375 FOXO1 phosphorylation, indicating that loss of PP2A activity-induced AKT phosphorylation on  
376 this residue alone is sufficient to increase FOXO1 phosphorylation (Fig. 7.D). These findings  
377 confirmed that in endometrial cells, WNK1 controls AKT activity through modulating its  
378 phosphorylation, which is partially mediated through PP2A (Fig. 7.E). As such, loss of WNK1 led  
379 to decreased PP2A activity and increased AKT phosphorylation, resulting in the pathological  
380 outcomes associated with AKT hypersignaling such as hyperplasia and FOXO1 deregulation (Fig.  
381 7.E, blue and red arrows).

382



## 383 Discussion

384

385 Reproductive biology has relied profoundly on transcriptomic analyses to identify novel players  
386 that may serve crucial functions in the regulation of fertility. While this approach has uncovered  
387 many key components in the reproductive tract, it is unable to detect alterations at the proteomic  
388 level, such as post translational modifications (PTMs). In many cases, the PTMs control protein  
389 activity and stability, and hence are the actual determinants of functional output. Using a  
390 proteomic approach, we identified WNK1 as a potential regulator of uterine biology with previously  
391 unreported reproductive functions.

392

393 In this study, we examined the *in vivo* function of WNK1 using a whole-uterus WNK1 knock-out  
394 mouse model. We demonstrate that loss of WNK1 led to hyperplasia, adenomyosis and impaired  
395 implantation, which could all negatively impact fertility. Importantly, we demonstrate for the first  
396 time that normally, WNK1 robustly represses AKT activity and that loss of WNK1 led to increased  
397 AKT phosphorylation and signaling. This was evident through the increased mTOR and FOXO1  
398 phosphorylation (28, 29, 35), resulting in nuclear exclusion of the latter and disrupted embryo  
399 implantation (27). It is worth noting that the *Wnk1<sup>d/d</sup>* mice only partially recapitulated the uterine  
400 FOXO1 knock-out phenotype (27), likely due to reduced FOXO1 activity rather than a complete  
401 inhibition. Additionally, AKT is well known for promoting cell proliferation and has long been  
402 explored as a target for therapeutic purposes in anti-cancer treatment (39). This is consistent with  
403 our observation that *Wnk1<sup>d/d</sup>* mice displayed epithelial hyperplasia resulting from escalated  
404 proliferation. Evidence has also shown a link between adenomyosis and estrogen induced AKT  
405 overactivity (40). Although not the focus of this work, the cellular changes and molecular events  
406 associated with WNK1 deficiency induced adenomyosis seems to parallel observations made in

407 humans, including excessive ECM, elevated *Moesin* expression and AKT hypersignaling (20, 22).  
408 This indicates that the *Wnk1*<sup>d/d</sup> mice could serve as an ideal model system to study adenomyosis  
409 in the future. Interestingly, there are evidence in literature showing that WNK1 is a substrate of  
410 AKT in other cellular and animal systems (41, 42). We did notice a reduction in phosphorylated  
411 WNK1 after AKT inhibition in both HEC1A and THESC cells (data not shown), suggesting that  
412 AKT could reciprocally interfere with WNK1 activity. These, together with our demonstration that  
413 in endometrial cells, WNK1 inhibits AKT phosphorylation and activity suggest that the WNK1-AKT  
414 relationship involves a negative feedback loop and is likely more complex than previously thought.

415

416 Given that 30% of the *Wnk1*<sup>d/d</sup> mice were able to implant promptly with normal numbers of  
417 embryos, we rarely observed normal sized litters from these mice. This suggested that even after  
418 a seemingly normal implantation, there must exist other impairments in subsequent pregnancy  
419 development accounting for the compromised fertility. This is supported by various observations  
420 during the breeding trial. The significant proportion of *Wnk1*<sup>d/d</sup> mice succumbing to pregnancy  
421 complications, including death near term and dystocia which indicated poor support of pregnancy  
422 and impairment in uterine muscle contractility. This could be attributed to impaired decidualization  
423 – indeed, our previous *in vitro* study demonstrated that WNK1 is a regulator of decidualization (3).  
424 We did not extensively characterize decidualization in this study due to the preceding implantation  
425 defect – which complicates decidualization data interpretation. However, transcriptomic analysis  
426 did identify alterations in several decidualizing regulators including Notch (HEY2 and JAG2), ERK  
427 and MUC signaling (43-45). Therefore, we are quite confident in speculating that loss of WNK1  
428 will likely negatively impact decidualization *in vivo*. Additionally, the premature loss of fertility in  
429 those mice that survived to the end of the breeding trial suggested that the postpartum tissue  
430 repair and remodeling may also be impacted by loss of WNK1. Interestingly, Zhu *et al.* reported

431 on the AKT dependent endometrial stromal cell repair in humans (46), providing a possible  
432 explanation for the premature sterility.

433

434 We further characterized the regulatory mechanism linking AKT to WNK1 and identified PP2A as  
435 an intermediate. We found that loss of WNK1 reduced PP2A subunits A and C in both humans  
436 and mice endometrial cells, and reduced PP2A phosphatase activity. Interestingly, RNA-seq  
437 results did not showed that the 4 genes encoding subunits A and C were altered. This suggests  
438 that the altered protein levels may be a result of altered protein stability rather than expression. It  
439 has been previously reported that the half-life of the PP2A subunits is dependent on their ability  
440 to complex with each other (38). Therefore, a possibility is that WNK1 facilitates the binding of the  
441 subunits, resulting in PP2A complex stabilization. As such, in the absence of WNK1, the  
442 decreased coupling of the subunits to each other led to shorter half-lives and decreased protein  
443 levels. It is worth noting that the antibody against PP2A subunit B used in this study targets only  
444 one of the thirteen isoforms (PPP2R2A). While this particular isoform was unaffected by loss of  
445 WNK1, it is possible that other subunit B isoforms may be affected. Mechanistically, WNK1 directly  
446 interacts with PPP2R1A and hence this interaction may be crucial for PP2A complex formation,  
447 however, further experimentation will be necessary to test this hypothesis. Future studies will aim  
448 to understand the biochemical nature of the PPP2R1A-WNK1 interaction, for example, whether  
449 WNK1 phosphorylates PPP2R1A, and if so, whether the phosphorylation interferes with PP2A  
450 subunits coupling. It is worth noting that there must be another mechanism through which WNK1  
451 is repressing AKT, as PPP2R1A knock-down in human cells restored only the phosphorylation on  
452 threonine 308. However, WNK1 ablation induced phosphorylation on both threonine 308 and  
453 serine 473, indicating that other regulators must be involved.

454

455 As aforementioned, uterine WNK1 ablation exhibited pleiotropic effects including epithelial  
456 hyperplasia and adenomyosis. Although neither is cancerous, both are progressive conditions  
457 which may lead to malignant transformation (47, 48). Functional interpretation of the  
458 transcriptome reiterated this, where many cancer development and progression associated  
459 signaling pathways were altered in the *Wnk1<sup>d/d</sup>* uteri, including elevated TGFB, AKT and estrogen  
460 (48-51). Strikingly, a recurrent mutation of *Ppp2r1a* is associated with serous endometrial  
461 carcinoma (52, 53), and this mutation has been found to impact oncogenic signaling through a  
462 dominant negative effect (54). It is possible that WNK1 could act to protect cells against cancer  
463 progression through stabilizing PP2A subunits and hence activity. While this speculation is made  
464 based on data from our current study, there are also studies suggesting that WNK1 promotes  
465 oncogenesis through stimulating angiogenesis (55). WNK1's exact role in endometrial cancer is  
466 yet unknown but worth further exploring, as mutation of the *WNK1* gene is an existing condition  
467 in humans. Expanding our knowledge on the potential pathogenic or beneficial consequences  
468 associated with altered WNK1 expression and regulation could be a valuable insight to have in  
469 the development of therapeutic interventions in the future. As the existing condition in humans is  
470 a gain-of-function mutation, one future direction is to characterize the effect of WNK1 over-  
471 expression on AKT signaling in the female reproductive tract, and the implication on uterine  
472 biology and oncogenesis. In summary, this study is a first to explore the reproductive function of  
473 WNK1 *in vivo*. We demonstrate that WNK1 is critical in maintaining normal uterine morphology,  
474 mediating epithelial homeostasis and implantation.

475

476

477 **Methods**

478

479 ***Study approval***

480 This study was conducted according to the federal regulations regarding the use of human  
481 subjects. Procedures were approved by the following ethics committee: Institutional Review  
482 Board/Committee-A (IRB) of Greenville Health System under IRB file #Pro0000093 and  
483 Pro00013885 and the University of Chapel Hill at North Carolina IRB under file #: 05-1757.  
484 Written, informed consents were obtained from all patients prior to participation.

485

486 All animal studies were conducted in accordance with the Guide for the Care and Use of  
487 Laboratory Animals, as published by the National Institute of Health. Animal protocols were  
488 approved by the Animal Care and Use Committee (ACUC) of National Institute of Environmental  
489 Health Sciences (protocol numbers 2015-0012 and 2015-0023). The mice were housed with a  
490 maximum of 5 per cage with a 12-hour light and dark cycle, and fed irradiated Teklad global soy  
491 protein-free extruded rodent diet (Harlem Laboratories, Inc., Indianapolis, IN) and fresh water ad  
492 libitum. Euthanization was carried out by carbon dioxide inhalation followed by cervical  
493 dislocation.

494

495 ***Generation of transgenic mice***

496 The *Wnk1<sup>ff</sup>* mice were a kind gift from Dr CL Huang (University of Iowa Healthcare), the  
497 generation of which was described in a previous publication(14). Briefly, the *Wnk1* floxed allele  
498 was established by insertion of *loxP* sites into the 5' and 3' region of exon 2 of the mouse *Wnk1*

499 gene. The  $Wnk1^{ff}$  mice were crossed to mice carrying Cre under the control of the progesterone  
500 receptor ( $PGR^{Cre}$ ) to generate conditional uterine  $Wnk1$  ablated mice ( $Wnk1^{d/d}$ , Fig. S1) (16).

501

### 502 ***Fertility trial***

503 Seven-week old  $Wnk1^{ff}$  (control) and  $Wnk1^{d/d}$  (experimental) mice were housed with wild-type  
504 CD1 males for a period of 6 months, during which the mice were monitored daily for pregnancy  
505 and delivery. Upon the first observation of delivery, the total number of pups including both live  
506 and dead were recorded.

507

### 508 ***Implantation determination and pseudopregnancy***

509 Mice of age 6-10 weeks were housed with wild-type C57BL/6J males, and monitored each  
510 morning until vaginal plug is observed (indicating that mating has occurred). The first noon  
511 following which the vaginal plug was seen was defined as gestation day (GD) 0.5. Mice were  
512 anesthetized by isoflurane inhalation on GD 4.5 and 5.5, followed by retro-orbital administration  
513 of 200  $\mu$ L of 1% Evans Blue Dye prepared in phosphate buffered saline (PBS). Mice were then  
514 euthanized, and the uterine horns harvested for implantation determination and imaging. For mice  
515 sacrificed on GD 4.5, the uterine horns were flushed using a p200 pipette if no implantation sites  
516 were observed, and the eluant was examined under brightfield microscope to determine presence  
517 of blastocysts. The uterine horns were then fixed 48 hours in 4% paraformaldehyde (PFA)  
518 prepared in PBS for histology and immunohistochemistry, or frozen on dry ice for RNA and protein  
519 extraction. For RNA-seq, pseudopregnancy was induced by mating the females to vasectomized  
520 wild-type male mice, and all procedures were conducted as described above except for the Evans  
521 Blue Dye injection, as no implantations were expected.

522 ***Superovulation assay***

523 Three-week old  $Wnk1^{ff}$  and  $Wnk1^{d/d}$  mice were subjected to a superovulation regimen, which  
524 began with intraperitoneal administration of 5 IU of pregnant mare's serum gonadotropin (catalog  
525 no. 493-10-2.5, Lee Biosolutions), followed by 5 IU of human chorionic gonadotropin (catalog no.  
526 869031, EMD Millipore) 48 hours later. Superovulated mice were placed with wild-type CD1 males  
527 overnight. Mating was confirmed by presence of vaginal plug the next morning (GD 0.5), and mice  
528 were euthanized on GD 1.5 followed by oviduct flushing. The number of embryos was determined  
529 by counting under a brightfield microscope.

530

531 ***Serum collection***

532 On GD or pseudopregnancy day (PPD) 4.5, mice were anesthetized by intraperitoneal  
533 administration of Fetal Plus (1mg/10g body mass) and whole blood was collected via retro-orbital  
534 puncture. Blood was allowed to clot at room temperature for approximately 30 minutes, then  
535 centrifuged at 1000 X G for 10 minutes at 4°C. The supernatant (serum) was moved into a fresh  
536 tube and stored at -80°C until hormone testing. Hormone testing was conducted by the Ligand  
537 Core Laboratory of University of Virginia, Center for Research in Reproduction.

538

539 ***High frequency ultrasound imaging***

540 On GDs 8.5, 10.5 and 12.5, high frequency ultrasound imaging was used to evaluate the uterus  
541 and embryo development. Dams were anesthetized by isoflurane inhalation and placed onto an  
542 electric heating pad to maintain body temperature. Abdominal hair was removed using depilatory  
543 cream (Nair™ Church & Dwight Co. Trenton, NJ), and eye lubricant was applied to prevent  
544 desiccation. Dams were manipulated into a supine position for the scan while heart rate and body

545 temperature were continuously monitored. Images were visualized and captured using the  
546 VisualSonics VevoR 2100 Imaging System with a 550s scan head (Fujifilm VisualSonics Inc.,  
547 Toronto, ON) at 55 megahertz. Each scanning session was limited to maximum 15 minutes, after  
548 which the dams were monitored until full recovery.

549

### 550 ***Tissue processing, histology, immunohistochemical and immunofluorescence staining***

551 For histology, immunohistochemistry and immunofluorescence, the tissues were similarly  
552 processed as described below. After 48 hour fixation, tissues were placed into 70% ethanol for  
553 a minimum of 48 hours. Tissues were then dehydrated and embedded in paraffin blocks and  
554 sectioned to 5  $\mu$ m thickness onto glass slides. Slides were heated at 60°C for 10 minutes, followed  
555 by 5 minutes cooling. Sections were deparaffinized by 3 serial incubations in Citrisolv clearing  
556 agent (catalog no. 22-143-975, Thermo Fisher), followed by rehydration through decreasing % of  
557 ethanol. For histology, sections were subjected to hematoxylin and eosin (H&E) and Masson's  
558 trichrome staining, followed by dehydration through increasing % of ethanol, incubation in Citrisolv  
559 and coverslipping. For immunohistochemistry, sections were subjected to antigen retrieval after  
560 rehydration by boiling in the Vector Labs Antigen Unmasking Solution as per manufacturer's  
561 instructions (H-3300, Vector Laboratories, Burlingame, CA, USA). Blocking of endogenous  
562 peroxidase was performed by treating the sections with 3% hydrogen peroxide diluted in distilled  
563 water for 10 minutes at room temperature. Tissues were blocked in 5% normal donkey serum  
564 (NDS) for 60 minutes at room temperature, prior to overnight incubation with the primary antibody  
565 at 4°C. The slides were washed twice in PBS for a total of 10 minutes at room temperature and  
566 secondary antibody diluted in 1% w/v bovine serum albumin (BSA) prepared in PBS was applied.  
567 The ABC reagent was applied to tissue according to the manufacturer's instructions (Vector Labs  
568 ABC PK-6100, Vector Laboratories). Signals were developed using the Vector Labs DAB  
569 ImmPACT Staining Kit (Vector Labs SK-4105, Vector Laboratories). Finally, the tissues sections



570 were counterstained with hematoxylin and dehydrated through increasing ethanol concentration,  
571 followed by Citrisolv incubation and coverslipping. For immunofluorescence, tissue sections were  
572 subjected to antigen retrieval as described above. Tissues were blocked in 0.4% v/v Triton X-100,  
573 1% BSA and 5% NDS for 30 minutes at room temperature followed by overnight incubation in  
574 primary antibody prepared in 0.4% Triton X-100/PBS at 4°C. Sections were washed 3 times 5  
575 minutes in PBS and incubated with secondary antibodies diluted in 0.4% Triton X-100/PBS for 90  
576 minutes at room temperature. Finally, the slides were washed 3 times 5 minutes in PBS, and  
577 coverslipped in DAPI containing mounting medium (Vectorshield Hardset™ Antifade Mounting  
578 Medium, catalog no. H-1400, Vector Laboratories). Details of antibodies used in this study are  
579 provided in table S6.

580

#### 581 ***RNA extraction and cDNA conversion***

582 The frozen tissues were disrupted in TRIzol reagent (Thermo Fisher) by bead milling, followed by  
583 2 aqueous phase separations using 1-Bromo-3-chloropropane and chloroform. Pure ethanol was  
584 added to the aqueous layer, and the RNA was extracted using the Qiagen RNeasy RNA mini  
585 prep kit columns as per manufacturer's instructions (Qiagen, Valencia, CA). Resulting RNA  
586 concentration and quality was determined using the NanoDrop ND-1000. cDNA was generated  
587 by reverse transcription using the M-MLV Reverse Transcriptase (catalog number 28025013  
588 Thermo Fisher) following the manufacturer's instructions.

589

#### 590 ***qRT-PCR***

591 qRT-PCR was performed using the SsoAdvanced™ Universal SYBR Green Supermix  
592 (1725274, Bio-Rad) with the following primers (from 5' to 3', F = forward and R = reverse): *Wnk1*  
593 – AGGCAGAGATTCAAAGAAGAGG (F) and CCCAGGAATCATAGAATCGAACA (R); *Msn* –

594 CCATGCCGAAGACGATCA (F) and CCAAACCTTCCCTCAAACCAATAG (R); and *Foxa2* –  
595 GAGACTTTGGGAGAGCTTTGAG (F) and GATCACTGTGGCCCATCTATTT (R). *Lif* expression  
596 was determined using the Taqman Master Mix (Life Technologies) and Taqman probes (Applied  
597 Biosystems). The Delta delta Ct values were calculated using 18S RNA control amplification  
598 results to acquire the relative mRNA expression for each sample.

599

### 600 ***RNA-sequencing***

601 For each mouse, 1 µg of total uterine RNA was sent to the NIH Intramural Sequencing Center to  
602 create a library using the TruSeq RNA Kit (Illumina, San Diego, CA, USA) following the  
603 manufacturer's instructions. The RNA libraries were sequenced with a HiSeq 2000 System  
604 (Illumina). The raw RNA reads (75 nt, paired-end) were processed by filtering with average quality  
605 score greater than 20. Reads that passed the initial processing were aligned to the mouse  
606 reference genome (mm10; Genome Reference Consortium Mouse Build 38 from December  
607 2011) using TopHat version 2.0.4 (56). Expression values of RNA-seq were expressed as  
608 fragments per kilobase of exon per million fragments (FPKM). Differential expression was  
609 calculated using Cuffdiff function from Cufflinks version 2.2(57). Transcripts with the average  
610 FPKM > 1 in at least one group, *q*-value < 0.05 and at least 1.5-fold difference in FPKM were  
611 defined as differentially expressed genes (DEGs). The data discussed in this publication have  
612 been deposited in NCBI's Gene Expression Omnibus and are accessible through GEO Series  
613 accession number GSE144802. Functional annotation for the differentially expressed genes  
614 derived from RNA-seq were analyzed by Ingenuity Pathway Analysis (IPA) and Database for  
615 Annotation, Visualization, and Integrated Discovery (DAVID)(58).

616

### 617 ***Human phospho-kinase antibody array***

618 Site specific phosphorylation levels of 43 kinases were measured using the Human Phospho-  
619 Kinase Array Kit (catalog no. ARY 003B, R&D Systems) according to the manufacturer's  
620 instructions with the experimental design as described below. Pseudopregnancy was induced in  
621 the  $Wnk1^{ff}$  and  $Wnk1^{d/d}$  mice as previously described, and mice were euthanized on PPD 4.5.  
622 Uterine tissues were frozen at  $-80^{\circ}\text{C}$  until ready to proceed. Lysate were extracted independently  
623 from 6 mice per group by bead milling in the lysis buffer provided within the kit, and protein  
624 concentrations were determined using the BCA Protein Assay Kit (catalog no. 23225, Pierce).  
625 Equal amounts from each mouse were pooled in each group (to a total of 900  $\mu\text{g}$ ), and the  
626 remaining steps followed the standard protocol of the kit. Signal intensity was quantified by  
627 ImageJ (59). Images shown in the main figure were chosen to allow visualization of maximal  
628 difference between  $Wnk1^{ff}$  and  $Wnk1^{d/d}$  mice for selected kinases, but quantification was  
629 performed using blots in the non-saturation range.

630

### 631 ***Protein extraction from uterine tissues and protein expression analysis***

632 Tissues were homogenized in RIPA Lysis and Extraction Buffer (Thermo Fisher) supplemented  
633 with protease inhibitor cocktail (cOmplete Mini, EDTA-free, catalog no. 11836170001, Roche  
634 Diagnostics) and phosphatase inhibitor cocktail (phosSTOP, catalog no. 4906837001, Roche  
635 Diagnostics), followed by centrifugation at 10,000 X G for 10 minutes at  $4^{\circ}\text{C}$ , and the supernatant  
636 was moved into fresh eppendorf. Protein concentrations were measured using the BCA Protein  
637 Assay Kit (Pierce). Heat denatured protein samples were resolved using 7.5%, 10% or gradient  
638 4-20% Criterion Tris-HCl precast gels (Bio-Rad), followed by transferring using the Trans-Blot  
639 Turbo Transfer System (Bio-Rad), as according to the manufacturer's instructions. PVDF and  
640 nitrocellulose membranes were used for target proteins  $> 200$  KDa and  $< 200$  KDa, respectively.  
641 After transfer, the membranes were blocked in 5% w/v non-fat milk or BSA prepared in Tris  
642 buffered saline with 0.1% Tween-20 (TBST). Membranes were incubated with primary antibody

643 at 4°C with shaking overnight, followed by three 10 minute washes in TBST the next morning.  
644 Membranes were proceeded to secondary antibody incubation at room temperature for at least  
645 one hour with shaking, and washed another 3 times in TBST. Depending on the expected signal  
646 strength, different peroxidase chemiluminescent substrates were used: KPL LumiGLO<sup>R</sup> (catalog  
647 no. 546101, Seracare), Clarity Western ECL Substrate (catalog no. 1705060, Bio-Rad), and  
648 Amersham ECL Prime Western Blotting Detection Reagent (catalog no. RPN2232, GE  
649 Healthcare Life Sciences). Antibody sources and dilutions are summarized in table S6. For each  
650 western blot, GAPDH or  $\beta$ -tubulin were detected as the loading control, and in cases where the  
651 target protein is in the same region as the loading control proteins, a duplicate gel was ran and  
652 transferred in parallel. For each set of samples, a representing GAPDH or  $\beta$ -tubulin blot is shown.  
653 Details of antibodies used in this study are provided in table S6.

654

### 655 ***Tissue clearing and three-dimensional reconstruction***

656 Uterine tissues were fixed in 4% PFA for 16 hours, followed by 3 rinses in PBS. Tissues were  
657 then incubated in hydrogel monomer solution AP40 (4% v/v acrylamide and 0.25% w/v VA-044 in  
658 PBS) for 72 hours at 4°C, protected from light. Oxygen was then removed from the samples using  
659 a chamber connected to vacuum and nitrogen, followed by incubation at 37°C for 3 hours to  
660 initiate tissue-hydrogel hybridization. Hydrogel was removed from the tissues via 3 PBS washes,  
661 and tissues were subsequently incubated in 8% SDS prepared in PBS for 7 days at 37°C with  
662 shaking, and the SDS solution replaced twice during incubation. The tissues were then washed  
663 5 times one hour in PBS and blocked in 5% NDS prepared in PBS/triton X-100 with 0.01% of  
664 sodium azide. The samples were then incubated in primary antibody prepared in antibody diluent  
665 (2% v/v NDS, 0.01% w/v sodium azide in PBST) for 6 days at room temperature with constant  
666 rotation, followed by 5 one hour washes in 0.1% v/v Triton in PBS (PBS-T). Secondary antibody  
667 was similarly prepared in antibody diluent and incubated for another 6 days at room temperature

668 with constant rotation and protected from light, replacing antibody half way through incubation.  
669 Finally, the samples were washed an additional 5 times one hour in PBS-T and incubated in  
670 Refractive Index Matching Solution (80% w/v Histodenz (catalog no. D2158, Sigma-Aldrich)  
671 prepared in 0.02M phosphate buffer, pH7.5 with 0.1% Tween-20 and 0.01% sodium azide,  
672 refractive index = 1.46) for 1-3 days, and samples were mounted in fresh Reflective Index  
673 Mounting Solution using a 1 mm deep iSpacer ([www.sunjinlabs.com](http://www.sunjinlabs.com)). Details of antibodies used  
674 in this study are provided in table S6.

675

### 676 ***Cell culture***

677 Human endometrial epithelial cell line HEC1A and telomerase-transformed human endometrial  
678 stromal cells (THESC) were obtained from American Type Culture Collection (ATCC, Rockville,  
679 MD, USA). HEC1A cells were cultured in McCoy's 5A modified medium (catalog no. 16600082,  
680 Gibco) and the THSEC cells were maintained in DMEM/F12 (1:1) (catalog no. 11330-032, Gibco),  
681 both supplemented with 10% fetal bovine serum (FBS, catalog no. 10437-028, Gibco) and 100  
682 U/mL penicillin and 100 µg/mL streptomycin, unless otherwise stated.

683

### 684 ***siRNA transfection and drug treatments***

685 Cells were transfected with siRNAs using the Lipofectamine RNAiMax transfection reagent  
686 (catalog no. 13778150, Thermo Fisher) following the manufacturer's protocol. Cells were  
687 transfected with 24 – 72 nM siRNA in transfection medium supplemented with 2% charcoal-  
688 stripped FBS (catalog no. 12676-029, Gibco) for 24-48 hours before replacing with fresh growth  
689 medium. Proteins were harvested from cells 72 hours after transfection unless otherwise stated.  
690 The siRNAs used in this study were: nontargeting siRNA (siCTRL, catalog no. D-001810-10-20,  
691 Dharmacon), *Wnk1* targeting siRNA (siWnk1, catalog no. L-005362-02-0005, Dharmacon), *Mtor*

692 targeting siRNA (simTOR, catalog no. L-003008-00-0005, Dharmacon), and *Ppp2r1a* targeting  
693 siRNA (siPPP2R1A, catalog no. L-060647-00-0005, Dharmacon). AKT and mTOR inhibitors  
694 GDC0941 and rapamycin (catalog no. S1065 and S1039, respectively, Selleckchem) were  
695 dissolved in DMSO, and cells were treated with 5  $\mu$ M GDC 0941 and 10 – 40  $\mu$ M rapamycin for  
696 24 hours, while the control cells received equivalent volumes of DMSO.

697

### 698 ***Immunofluorescence of cultured cells***

699 Cells were cultured in 4-chambered coverglass (catalog no. 155382, Thermo Fisher) as described  
700 above. Following transfection and/or drug treatment for the appropriate time period, cells were  
701 rinsed in cold PBS, fixed in 4% PFA and permeabilized in 0.5% Triton X-100/PBS for 10 and 5  
702 minutes, respectively, at room temperature. Cells were then incubated in blocking buffer (5% v/v  
703 NDS, 0.2% v/v fish gelatin (catalog no. G7765, Sigma-Aldrich), 0.2% v/v Tween-20 in PBS) for  
704 30 minutes at 37°C. Primary antibody was diluted in blocking buffer and added to the cells for 60  
705 minutes, followed by secondary antibody for another 60 minutes; both incubation steps were  
706 performed at 37°C in a humidified chamber. Finally, cells were rinsed 3 times with 0.2% Tween-  
707 20/PBS and coverslipped using a DAPI containing mounting medium (Vectorshield Hardset™  
708 Antifade Mounting Medium, catalog no. H-1400, Vector Laboratories). Details of antibodies used  
709 in this study are provided in table S6.

710

### 711 ***WNK1 Immunoprecipitation Mass-spectrometry***

712 HEC1A cells were grown to 70% confluency, followed by collection using trypsin. Cells were  
713 washed 2 X in cold PBS, followed by resuspension in cell lysis buffer (50 mM Tris-HCl pH 7.5,  
714 150 mM NaCl, 1 mM EDTA, 1% NP-40, 1% sodium deoxycholate, 0.1% SDS, with protease and  
715 phosphatase inhibitors added fresh to 1 X). Cells were incubated on ice for 10 minutes, followed

716 by sonication on medium power (3 X 5 seconds). Lysate was centrifuged at 13,000 X G for 10  
717 minutes at 4°C. WNK1 targeting antibody was added at 1:100 to the supernatant, and incubated  
718 with rotation at 4°C overnight. Prewashed beads (50% protein A and 50% protein G, catalog  
719 numbers 10002D and 10004D, respectively, Thermo Fisher) were added to the immunocomplex  
720 and incubated for 30 minutes at room temperature with rotation. Beads were pelleted using a  
721 magnetic separation rack, followed by 3 washes in lysis buffer. Beads were heated to 100°C with  
722 3 X SDS buffer (150 mM Tris-HCl pH 6.8, 6% SDS, 0.3% BPB, 30% glycerol, 3% B-  
723 mercaptoethanol) for 5 minutes, before electrophoresis through a 7.5% Criterion Tris-HCl precast  
724 gel (Bio-Rad). Gel regions were excised from the SDS-PAGE gel and minced, and digests were  
725 performed with a ProGest robotic digester (Genomic Solutions) where the gel pieces were  
726 destained by incubation in 25 mM ammonium bicarbonate with 50% acetonitrile (v/v) twice for a  
727 total of 30 minutes. The gel pieces were dehydrated in acetonitrile, followed by drying under a  
728 nitrogen stream, and further incubated with 250 ng trypsin (Promega) for 8 hours at 37°C. The  
729 digests were collected, and peptides were re-extracted three times. The extractions were pooled  
730 for each sample, lyophilized and resuspended in 20 µL 0.1% formic acid. The protein digests were  
731 analyzed by LC/MS on a Q Exactive Plus mass spectrometer (Thermo Fisher) interfaced with a  
732 nanoAcquity UPLC system (Waters Corporation), and equipped with a 75 µm x 150 mm BEH  
733 dC18 column (1.8 µm particle, Waters Corporation) and a C18 trapping column (18 µm x 20 mm)  
734 with a 5 µm particle size at a flow rate of 400 nL/min. The trapping column was positioned in-line  
735 of the analytical column and upstream of a micro-tee union which was used both as a vent for  
736 trapping and as a liquid junction. Trapping was performed using the initial solvent composition. A  
737 volume of 5 µL of digested sample was injected into the column, and peptides were eluted by  
738 using a linear gradient from 99% solvent A (0.1% formic acid in water (v/v)) and 1% solvent B  
739 (0.1% formic acid in acetonitrile (v/v)), to 40% solvent B over 60 minutes. For the mass  
740 spectrometry, a data dependent acquisition method was employed with an exclusion time of 15  
741 seconds and an exclusion of +1 charge states. The mass spectrometer was equipped with a



742 NanoFlex source and was used in the positive ion mode. Instrument parameters were as follows:  
743 sheath gas, 0; auxiliary gas, 0; sweep gas, 0; spray voltage, 2.7 kV; capillary temperature, 275°C;  
744 S-lens, 60; scan range (m/z) of 200 to 2000; 2 m/z isolation window; resolution: 70,000; automated  
745 gain control (AGC),  $2 \times 10^5$  ions; and a maximum IT of 200 ms. Mass calibration was performed  
746 before data acquisition using the Pierce LTQ Velos Positive Ion Calibration mixture (Thermo  
747 Fisher). Peak lists were generated from the LC/MS data using Mascot Distiller (Matrix Science)  
748 and the resulting peak lists were searched using the Spectrum Mill software package (Agilent)  
749 against the SwissProt database. Searches were performed using trypsin specificity and allowed  
750 for one missed cleavage and variable methionine oxidation. Mass tolerance were 20 ppm for MS  
751 scans and 50 ppm for MSMS scans.

752

### 753 **Generation of mammalian YFP-WNK1 expression constructs**

754 The coding region of the WNK1 sequence (NM\_014823.3) with attL sites and N-terminal TEV  
755 cleavage site was synthesized by GeneWiz Inc. and cloned into pUC57 (Kanamycin) plasmid.  
756 Gateway Cloning using LR Clonase II mix (Thermo Fisher) was used to transfer the WNK1  
757 sequence into the Vivid Colors pcDNA6.2/N-YFP vectors (Thermo Fisher), which created the  
758 mammalian expression vectors with YFP fused to the N-terminal end of WNK1 (Fig. S7, c4161).

759

### 760 **Co-Immunoprecipitation**

761 HEC1A cells were transfected with cYFP or c4161 for 48 hours, followed by trypsinization, 3  
762 washes and resuspension in lysis buffer (50 mM Tris pH8.0, 400 mM NaCl, 0.1% NP-40 and 0.5  
763 mM DTT, with protease and phosphatase inhibitors freshly added to 1 X). The lysate was  
764 incubated at 4°C with rotation for 30 minutes. Lysates were centrifuged at 21,100 X G for 10  
765 minutes at 4°C, and the supernatant was added to 1.5 volumes of 25% glycerol, followed by



766 centrifugation at 21,100 X G for 10 minutes at 4°C. Anti-GFP resin slurry was added to the  
767 supernatant and nutated for 1 hour at 4°C. Beads were centrifuged at 1,000 X G for 5 minutes,  
768 4°C, followed by 6 washes in 100 µL of PBST in Bio-Spin columns (catalog number 7326204,  
769 Bio-Rad). The bound immunocomplexes were eluted via 0.1 M glycine, pH 2.0, and eluent was  
770 neutralized using 2M Tris-HCl, pH 8.0.

771

## 772 **Confocal Microscopy**

773 All fluorescent images presented in this study were captured using the Zeiss LSM 780 UV  
774 confocal microscope.

775

## 776 **Statistics**

777 GraphPad Prism versions 7 and 8 were used for data analysis. Each set of data points were first  
778 subjected for normality tests. Student's *t* tests and Mann-Whitney tests were performed for  
779 normally distributed data and non-normally distributed data, respectively. For % of mice with  
780 implantation post mating, Fisher's exact test was performed. In each case, a *p*-value less than  
781 0.05 was considered as significant.

782

783 **Author Contributions**

784

785 Conceptualization, R.A.C., S.P.W. and F.J.D.; Methodology, R.A.C. and F.J.D.; Validation,  
786 R.A.C.; Formal Analysis, R.A.C. and T.W.; Investigation, R.A.C.; Resources, S.L.Y., J.L., C.L.H.  
787 and F.J.D.; Data Curation, R.A.C. and T.W.; Writing – Original Draft, R.A.C.; Writing – Review &  
788 Editing, R.A.C. and F.J.D.; Visualization, R.A.C.; Supervision, F.J.D.; Project Administration,  
789 R.A.C. and F.J.D.; Funding Acquisition, F.J.D.

790

791 **Acknowledgements**

792

793 This work was supported in part by Intramural Research Program of the National Institute  
794 of Health (Z1AES103311-01 (F.J.D.)); the Eunice Kennedy Shriver National Institute of  
795 Child Health & Human Development (RO1 HD042311 (J.P.L.)); and National Institute of  
796 Diabetes and Digestive and Kidney Diseases (RO1 DK111542 (C.-L.H)). The authors  
797 thank Dr Sheng Song for guidance on the CLARITY technique; Dr Nyssa Adams for  
798 conducting the initial breeding trial, Dr Carmen Williams and Dr Sophia Tsai for reviewing  
799 the manuscript. We appreciate support from the NIEHS animal facility, Knockout Mouse  
800 Core, Digital Imaging Core, the Epigenomics and DNA Sequencing Core, the Fluorescent  
801 Microscopy and Imaging Core, the Mass Spectrometry Research and Support Group, the  
802 Structural Biology Core of NIEHS for their support and guidance with specialized  
803 techniques, as well as the Ligand Assay and Analysis Core at the University of Virginia.

804

## 805 References

- 806 1. Wang H, Dey SK. Roadmap to embryo implantation: clues from mouse models. *Nature reviews*  
807 *Genetics*. 2006;7(3):185-99.
- 808 2. Large MJ, Wetendorf M, Lanz RB, Hartig SM, Creighton CJ, Mancini MA, et al. The epidermal  
809 growth factor receptor critically regulates endometrial function during early pregnancy. *PLoS genetics*.  
810 2014;10(6):e1004451.
- 811 3. Adams NR, Vasquez YM, Mo Q, Gibbons W, Kovanci E, DeMayo FJ. WNK lysine deficient protein  
812 kinase 1 regulates human endometrial stromal cell decidualization, proliferation, and migration in part  
813 through mitogen-activated protein kinase 7. *Biology of reproduction*. 2017;97(3):400-12.
- 814 4. Moore TM, Garg R, Johnson C, Coptcoat MJ, Ridley AJ, Morris JD. PSK, a novel STE20-like kinase  
815 derived from prostatic carcinoma that activates the c-Jun N-terminal kinase mitogen-activated protein  
816 kinase pathway and regulates actin cytoskeletal organization. *The Journal of biological chemistry*.  
817 2000;275(6):4311-22.
- 818 5. Nagase T, Ishikawa K, Nakajima D, Ohira M, Seki N, Miyajima N, et al. Prediction of the coding  
819 sequences of unidentified human genes. VII. The complete sequences of 100 new cDNA clones from  
820 brain which can code for large proteins in vitro. *DNA research : an international journal for rapid*  
821 *publication of reports on genes and genomes*. 1997;4(2):141-50.
- 822 6. Xu B, English JM, Wilsbacher JL, Stippec S, Goldsmith EJ, Cobb MH. WNK1, a novel mammalian  
823 serine/threonine protein kinase lacking the catalytic lysine in subdomain II. *The Journal of biological*  
824 *chemistry*. 2000;275(22):16795-801.
- 825 7. Wilson FH, Disse-Nicodeme S, Choate KA, Ishikawa K, Nelson-Williams C, Desitter I, et al. Human  
826 hypertension caused by mutations in WNK kinases. *Science (New York, NY)*. 2001;293(5532):1107-12.
- 827 8. Disse-Nicodème S, Achard JM, Desitter I, Houot AM, Fournier A, Corvol P, et al. A new locus on  
828 chromosome 12p13.3 for pseudohypoaldosteronism type II, an autosomal dominant form of  
829 hypertension. *American journal of human genetics*. 2000;67(2):302-10.
- 830 9. Lafreniere RG, MacDonald ML, Dube MP, MacFarlane J, O'Driscoll M, Brais B, et al. Identification  
831 of a novel gene (HSN2) causing hereditary sensory and autonomic neuropathy type II through the Study  
832 of Canadian Genetic Isolates. *American journal of human genetics*. 2004;74(5):1064-73.
- 833 10. Xu BE, Stippec S, Chu PY, Lazrak A, Li XJ, Lee BH, et al. WNK1 activates SGK1 to regulate the  
834 epithelial sodium channel. *Proceedings of the National Academy of Sciences of the United States of*  
835 *America*. 2005;102(29):10315-20.
- 836 11. Wade JB, Fang L, Liu J, Li D, Yang CL, Subramanya AR, et al. WNK1 kinase isoform switch  
837 regulates renal potassium excretion. *Proceedings of the National Academy of Sciences of the United*  
838 *States of America*. 2006;103(22):8558-63.
- 839 12. Anselmo AN, Earnest S, Chen W, Juang YC, Kim SC, Zhao Y, et al. WNK1 and OSR1 regulate the  
840 Na<sup>+</sup>, K<sup>+</sup>, 2Cl<sup>-</sup> cotransporter in HeLa cells. *Proceedings of the National Academy of Sciences of the United*  
841 *States of America*. 2006;103(29):10883-8.
- 842 13. Vitari AC, Deak M, Morrice NA, Alessi DR. The WNK1 and WNK4 protein kinases that are  
843 mutated in Gordon's hypertension syndrome phosphorylate and activate SPAK and OSR1 protein  
844 kinases. *The Biochemical journal*. 2005;391(Pt 1):17-24.
- 845 14. Xie J, Wu T, Xu K, Huang IK, Cleaver O, Huang CL. Endothelial-specific expression of WNK1 kinase  
846 is essential for angiogenesis and heart development in mice. *The American journal of pathology*.  
847 2009;175(3):1315-27.
- 848 15. Xie J, Yoon J, Yang SS, Lin SH, Huang CL. WNK1 protein kinase regulates embryonic  
849 cardiovascular development through the OSR1 signaling cascade. *The Journal of biological chemistry*.  
850 2013;288(12):8566-74.

- 851 16. Soyal SM, Mukherjee A, Lee KY, Li J, Li H, DeMayo FJ, et al. Cre-mediated recombination in cell  
852 lineages that express the progesterone receptor. *Genesis (New York, NY : 2000)*. 2005;41(2):58-66.
- 853 17. Yang B, Treweek JB, Kulkarni RP, Deverman BE, Chen CK, Lubeck E, et al. Single-cell phenotyping  
854 within transparent intact tissue through whole-body clearing. *Cell*. 2014;158(4):945-58.
- 855 18. Yuan J, Deng W, Cha J, Sun X, Borg J-P, Dey SK. Tridimensional visualization reveals direct  
856 communication between the embryo and glands critical for implantation. *Nature communications*.  
857 2018;9(1):603.
- 858 19. Arora R, Fries A, Oelerich K, Marchuk K, Sabeur K, Giudice LC, et al. Insights from imaging the  
859 implanting embryo and the uterine environment in three dimensions. *Development (Cambridge,  
860 England)*. 2016;143(24):4749-54.
- 861 20. Ohara R, Michikami H, Nakamura Y, Sakata A, Sakashita S, Satomi K, et al. Moesin  
862 overexpression is a unique biomarker of adenomyosis. *Pathology international*. 2014;64(3):115-22.
- 863 21. Frantz C, Stewart KM, Weaver VM. The extracellular matrix at a glance. *Journal of cell science*.  
864 2010;123(Pt 24):4195-200.
- 865 22. Kishi Y, Shimada K, Fujii T, Uchiyama T, Yoshimoto C, Konishi N, et al. Phenotypic  
866 characterization of adenomyosis occurring at the inner and outer myometrium. *PloS one*.  
867 2017;12(12):e0189522.
- 868 23. Stewart CL, Kaspar P, Brunet LJ, Bhatt H, Gadi I, Kontgen F, et al. Blastocyst implantation  
869 depends on maternal expression of leukemia inhibitory factor. *Nature*. 1992;359(6390):76-9.
- 870 24. Dey SK, Lim H, Das SK, Reese J, Paria BC, Daikoku T, et al. Molecular cues to implantation.  
871 *Endocrine reviews*. 2004;25(3):341-73.
- 872 25. Wetendorf M, Wu SP, Wang X, Creighton CJ, Wang T, Lanz RB, et al. Decreased epithelial  
873 progesterone receptor A at the window of receptivity is required for preparation of the endometrium  
874 for embryo attachment. *Biology of reproduction*. 2017;96(2):313-26.
- 875 26. Goddard LM, Murphy TJ, Org T, Enciso JM, Hashimoto-Partyka MK, Warren CM, et al.  
876 Progesterone receptor in the vascular endothelium triggers physiological uterine permeability  
877 preimplantation. *Cell*. 2014;156(3):549-62.
- 878 27. Vasquez YM, Wang X, Wetendorf M, Franco HL, Mo Q, Wang T, et al. FOXO1 regulates uterine  
879 epithelial integrity and progesterone receptor expression critical for embryo implantation. *PLoS  
880 genetics*. 2018;14(11):e1007787.
- 881 28. Brunet A, Bonni A, Zigmond MJ, Lin MZ, Juo P, Hu LS, et al. Akt promotes cell survival by  
882 phosphorylating and inhibiting a Forkhead transcription factor. *Cell*. 1999;96(6):857-68.
- 883 29. Tang ED, Nunez G, Barr FG, Guan KL. Negative regulation of the forkhead transcription factor  
884 FKHR by Akt. *The Journal of biological chemistry*. 1999;274(24):16741-6.
- 885 30. Cha J, Bartos A, Park C, Sun X, Li Y, Cha SW, et al. Appropriate crypt formation in the uterus for  
886 embryo homing and implantation requires Wnt5a-ROR signaling. *Cell reports*. 2014;8(2):382-92.
- 887 31. Aplin JD, Meseguer M, Simón C, Ortíz ME, Croxatto H, Jones CJ. MUC1, glycans and the cell-  
888 surface barrier to embryo implantation. *Biochemical Society transactions*. 2001;29(Pt 2):153-6.
- 889 32. Daikoku T, Cha J, Sun X, Tranguch S, Xie H, Fujita T, et al. Conditional deletion of Msx homeobox  
890 genes in the uterus inhibits blastocyst implantation by altering uterine receptivity. *Developmental cell*.  
891 2011;21(6):1014-25.
- 892 33. Folkes AJ, Ahmadi K, Alderton WK, Alix S, Baker SJ, Box G, et al. The identification of 2-(1H-  
893 indazol-4-yl)-6-(4-methanesulfonyl-piperazin-1-ylmethyl)-4-morpholin-4-yl-t hieno[3,2-d]pyrimidine  
894 (GDC-0941) as a potent, selective, orally bioavailable inhibitor of class I PI3 kinase for the treatment of  
895 cancer. *Journal of medicinal chemistry*. 2008;51(18):5522-32.
- 896 34. Malley CO, Pidgeon GP. The mTOR pathway in obesity driven gastrointestinal cancers: Potential  
897 targets and clinical trials. *BBA clinical*. 2016;5:29-40.

- 898 35. Dan HC, Ebbs A, Pasparakis M, Van Dyke T, Basseres DS, Baldwin AS. Akt-dependent activation  
899 of mTORC1 complex involves phosphorylation of mTOR (mammalian target of rapamycin) by IkkappaB  
900 kinase alpha (IKKalpha). *The Journal of biological chemistry*. 2014;289(36):25227-40.
- 901 36. Kurosawa K, Inoue Y, Kakugawa Y, Yamashita Y, Kanazawa K, Kishimoto K, et al. Loss of protein  
902 phosphatase 6 in mouse keratinocytes enhances K-ras(G12D) -driven tumor promotion. *Cancer science*.  
903 2018;109(7):2178-87.
- 904 37. Ye J, Shi H, Shen Y, Peng C, Liu Y, Li C, et al. PP6 controls T cell development and homeostasis by  
905 negatively regulating distal TCR signaling. *Journal of immunology (Baltimore, Md : 1950)*.  
906 2015;194(4):1654-64.
- 907 38. Seshacharyulu P, Pandey P, Datta K, Batra SK. Phosphatase: PP2A structural importance,  
908 regulation and its aberrant expression in cancer. *Cancer letters*. 2013;335(1):9-18.
- 909 39. Shariati M, Meric-Bernstam F. Targeting AKT for cancer therapy. *Expert opinion on*  
910 *investigational drugs*. 2019;28(11):977-88.
- 911 40. Xue J, Zhang H, Liu W, Liu M, Shi M, Wen Z, et al. Metformin inhibits growth of eutopic stromal  
912 cells from adenomyotic endometrium via AMPK activation and subsequent inhibition of AKT  
913 phosphorylation: a possible role in the treatment of adenomyosis. *Reproduction (Cambridge, England)*.  
914 2013;146(4):397-406.
- 915 41. Vitari AC, Deak M, Collins BJ, Morrice N, Prescott AR, Phelan A, et al. WNK1, the kinase mutated  
916 in an inherited high-blood-pressure syndrome, is a novel PKB (protein kinase B)/Akt substrate. *The*  
917 *Biochemical journal*. 2004;378(Pt 1):257-68.
- 918 42. Jiang ZY, Zhou QL, Holik J, Patel S, Leszyk J, Coleman K, et al. Identification of WNK1 as a  
919 substrate of Akt/protein kinase B and a negative regulator of insulin-stimulated mitogenesis in 3T3-L1  
920 cells. *The Journal of biological chemistry*. 2005;280(22):21622-8.
- 921 43. Afshar Y, Jeong JW, Roqueiro D, DeMayo F, Lydon J, Radtke F, et al. Notch1 mediates uterine  
922 stromal differentiation and is critical for complete decidualization in the mouse. *FASEB journal : official*  
923 *publication of the Federation of American Societies for Experimental Biology*. 2012;26(1):282-94.
- 924 44. Lee CH, Kim TH, Lee JH, Oh SJ, Yoo JY, Kwon HS, et al. Extracellular signal-regulated kinase 1/2  
925 signaling pathway is required for endometrial decidualization in mice and human. *PloS one*.  
926 2013;8(9):e75282.
- 927 45. Zhang L, Patterson AL, Zhang L, Teixeira JM, Pru JK. Endometrial stromal beta-catenin is required  
928 for steroid-dependent mesenchymal-epithelial cross talk and decidualization. *Reproductive biology and*  
929 *endocrinology : RB&E*. 2012;10:75.
- 930 46. Zhu H, Jiang Y, Pan Y, Shi L, Zhang S. Human menstrual blood-derived stem cells promote the  
931 repair of impaired endometrial stromal cells by activating the p38 MAPK and AKT signaling pathways.  
932 *Reproductive biology*. 2018;18(3):274-81.
- 933 47. Yeh CC, Su FH, Tzeng CR, Muo CH, Wang WC. Women with adenomyosis are at higher risks of  
934 endometrial and thyroid cancers: A population-based historical cohort study. *PloS one*.  
935 2018;13(3):e0194011.
- 936 48. Sobczuk K, Sobczuk A. New classification system of endometrial hyperplasia WHO 2014 and its  
937 clinical implications. *Przegląd menopauzalny = Menopause review*. 2017;16(3):107-11.
- 938 49. Daikoku T, Hirota Y, Tranguch S, Joshi AR, DeMayo FJ, Lydon JP, et al. Conditional loss of uterine  
939 Pten unfaithfully and rapidly induces endometrial cancer in mice. *Cancer research*. 2008;68(14):5619-27.
- 940 50. Kriseman M, Monsivais D, Agno J, Masand RP, Creighton CJ, Matzuk MM. Uterine double-  
941 conditional inactivation of Smad2 and Smad3 in mice causes endometrial dysregulation, infertility, and  
942 uterine cancer. *Proceedings of the National Academy of Sciences of the United States of America*.  
943 2019;116(9):3873-82.
- 944 51. Pavlidou A, Vlahos NF. Molecular alterations of PI3K/Akt/mTOR pathway: a therapeutic target in  
945 endometrial cancer. *TheScientificWorldJournal*. 2014;2014:709736.

- 946 52. Kuhn E, Wu RC, Guan B, Wu G, Zhang J, Wang Y, et al. Identification of molecular pathway  
947 aberrations in uterine serous carcinoma by genome-wide analyses. *Journal of the National Cancer*  
948 *Institute*. 2012;104(19):1503-13.
- 949 53. Zhao S, Choi M, Overton JD, Bellone S, Roque DM, Cocco E, et al. Landscape of somatic single-  
950 nucleotide and copy-number mutations in uterine serous carcinoma. *Proceedings of the National*  
951 *Academy of Sciences of the United States of America*. 2013;110(8):2916-21.
- 952 54. Haesen D, Abbasi Asbagh L, Derua R, Hubert A, Schrauwen S, Hoorne Y, et al. Recurrent  
953 PPP2R1A Mutations in Uterine Cancer Act through a Dominant-Negative Mechanism to Promote  
954 Malignant Cell Growth. *Cancer research*. 2016;76(19):5719-31.
- 955 55. Sie ZL, Li RY, Sampurna BP, Hsu PJ, Liu SC, Wang HD, et al. WNK1 Kinase Stimulates Angiogenesis  
956 to Promote Tumor Growth and Metastasis. *Cancers*. 2020;12(3).
- 957 56. Trapnell C, Pachter L, Salzberg SL. TopHat: discovering splice junctions with RNA-Seq.  
958 *Bioinformatics (Oxford, England)*. 2009;25(9):1105-11.
- 959 57. Trapnell C, Williams BA, Pertea G, Mortazavi A, Kwan G, van Baren MJ, et al. Transcript assembly  
960 and quantification by RNA-Seq reveals unannotated transcripts and isoform switching during cell  
961 differentiation. *Nature biotechnology*. 2010;28(5):511-5.
- 962 58. Huang da W, Sherman BT, Lempicki RA. Systematic and integrative analysis of large gene lists  
963 using DAVID bioinformatics resources. *Nature protocols*. 2009;4(1):44-57.
- 964 59. Schneider CA, Rasband WS, Eliceiri KW. NIH Image to ImageJ: 25 years of image analysis. *Nature*  
965 *methods*. 2012;9(7):671-5.
- 966



967 **FIGURES AND FIGURE LEGENDS**

968

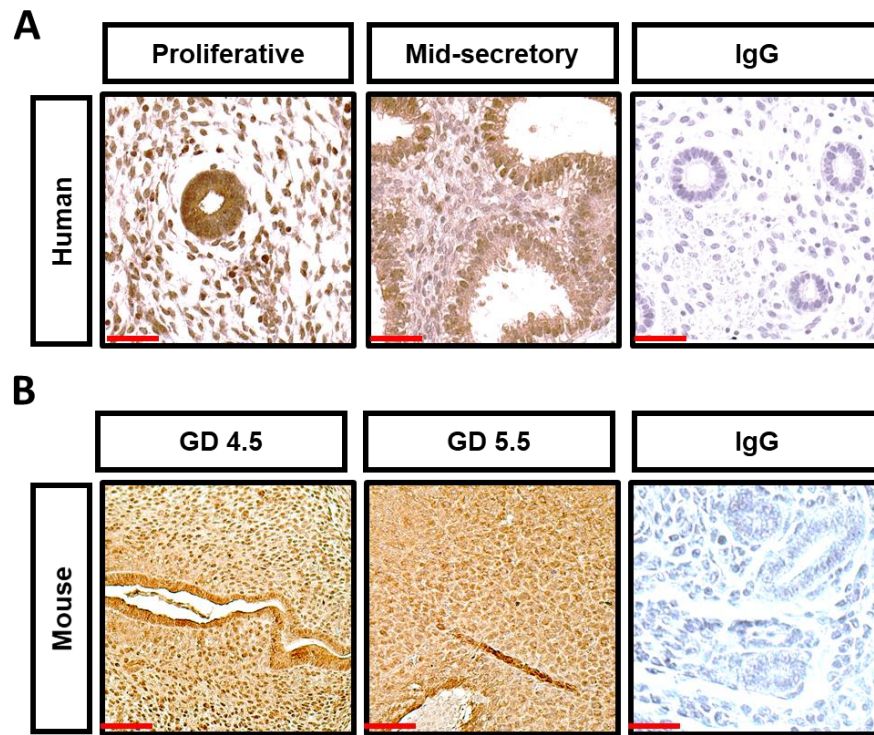

969

970

971 **Figure 1. WNK1 is expressed in the uterus during the window of implantation in both**  
972 **humans and mice.** (A and B) Immunohistochemical staining of WNK1 in proliferative and mid-  
973 secretory phased endometrial tissues from fertile women (A), and during receptive gestation day  
974 (GD) 4.5 and post implantation GD 5.5 in the uterus of wild-type mice (B). IgG served as negative  
975 controls, scale bars = 50 μm.

976



977

978

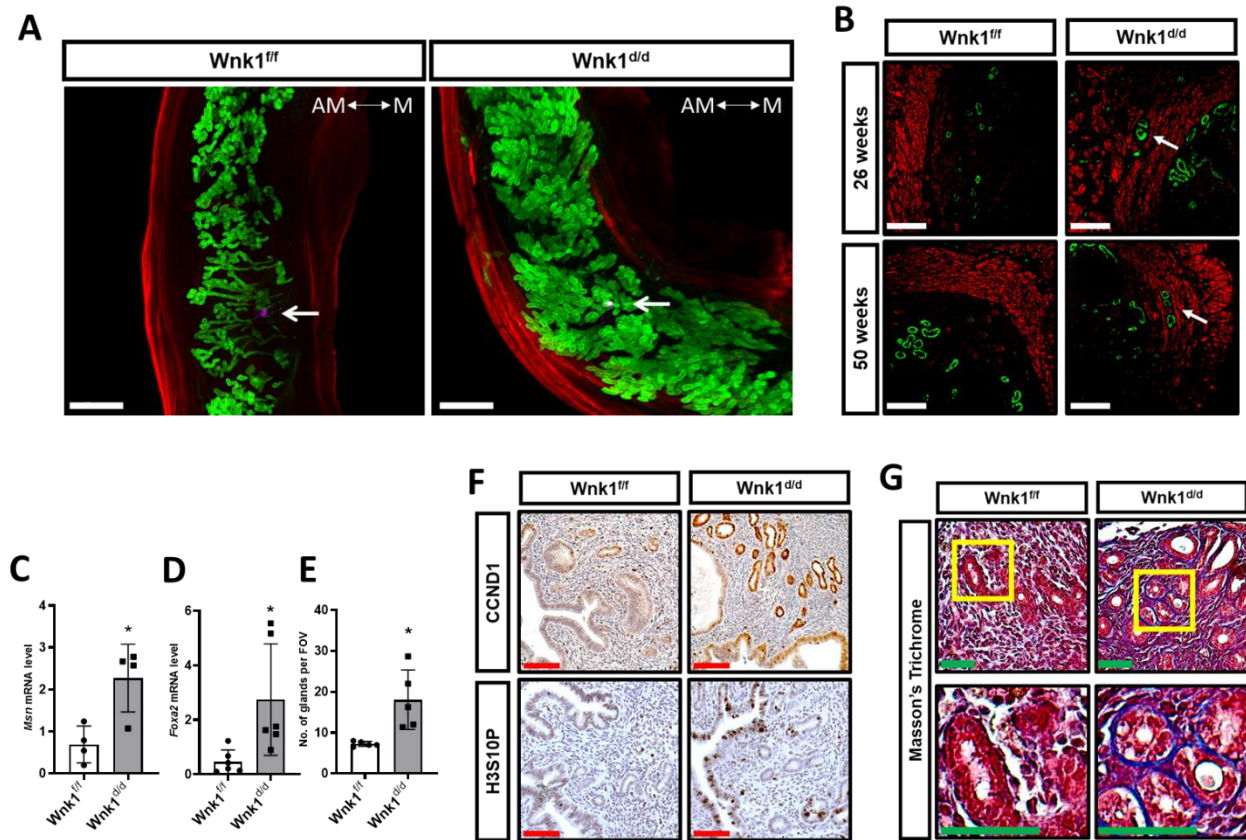

979

980

981 **Figure 2. WNK1 ablation altered uterine morphology and microenvironment.** (A) Three-  
 982 dimensional reconstruction of *Wnk1<sup>f/f</sup>* and *Wnk1<sup>d/d</sup>* uteri on GD 4.5 using tissue clearing and  
 983 confocal microscopy. The glands, myometrium and embryo were marked by FOXA2 (green),  
 984 ACTA2 (red) and OCT4 (purple), respectively. Images were captured by tile-scanning and Z-  
 985 stacking, and reassembled *in silico* using Imaris software. White arrow indicates position of the  
 986 embryo. Scale bars = 500  $\mu$ m. The antimesometrial (AM) and mesometrial (M) sides of the tissue  
 987 are indicated. (B) Immunofluorescence of uterine cross section showing glands (FOXA2, green)  
 988 and myometrium (ACTA2, red) from *Wnk1<sup>f/f</sup>* and *Wnk1<sup>d/d</sup>* uteri. White arrows indicate gland  
 989 extension into myometrium. Scale bars = 50  $\mu$ m. (C) Adenomyosis biomarker *Msn* mRNA  
 990 expression as determined by qRT-PCR (n = 4). (D) Quantification of *Foxa2* mRNA expression as  
 991 determined by qRT-PCR (n = 6), and (E) Quantification of number of glands per cross section for  
 992 *Wnk1<sup>f/f</sup>* and *Wnk1<sup>d/d</sup>* mice (n = 6). (F) Expression of mitotic markers CCND1 and H3S10P in the  
 993 uterus of 26-week-old *Wnk1<sup>f/f</sup>* and *Wnk1<sup>d/d</sup>* mice, scale bars = 100  $\mu$ m. (G) Masson's trichrome  
 994 staining of uteri cross section from 26 and 50 week old *Wnk1<sup>f/f</sup>* and *Wnk1<sup>d/d</sup>* mice, scale bars =  
 995 100  $\mu$ m. Yellow boxes indicate region shown at higher magnification in lower panels. All  
 996 quantitative results shown are average  $\pm$  SD, \*  $p < 0.05$ .

997

998

999

1000

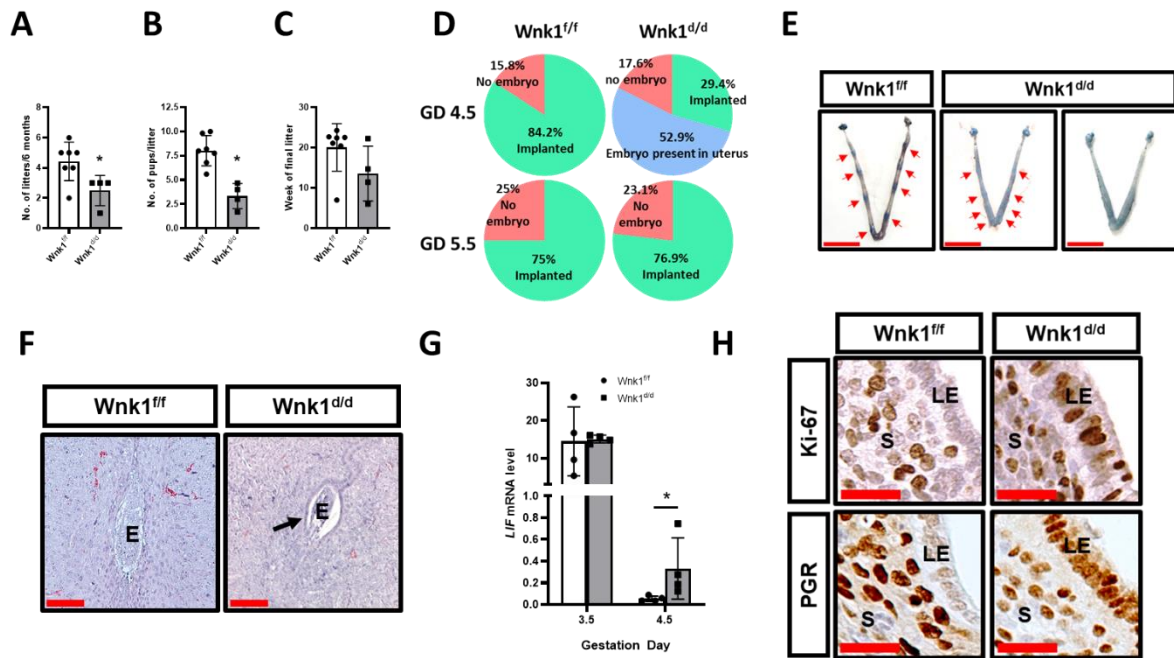

1001

1002

**Figure 3. Uterine WNK1 ablation compromised fertility and impaired implantation in mice.**

(A - C) Results from a 6-month breeding trial where the *Wnk1<sup>+/+</sup>* (n = 7) and *Wnk1<sup>d/d</sup>* (n = 4) mice were housed with wildtype males, showing average number of litters produced, (B) average number of pups per litter produced and (C) time of last delivery. Results shown are mean  $\pm$  SD, \*  $p < 0.05$ . (D) Percentage of mated *Wnk1<sup>+/+</sup>* and *Wnk1<sup>d/d</sup>* mice with implantation (green), without implantation (pink), and without implantation but presented embryos in the uterus (blue) on GD 4.5 and GD 5.5, n = 19 and 12 for *Wnk1<sup>+/+</sup>* mice on GD 4.5 and GD 5.5, respectively; and n = 17 and 13 for *Wnk1<sup>d/d</sup>* mice on GD 4.5 and GD 5.5, respectively. Red arrows indicate position of implantation sites. (E) Gross uterine morphology of *Wnk1<sup>+/+</sup>* and *Wnk1<sup>d/d</sup>* mice on GD 4.5, scale bars = 1 cm. (F) Hematoxylin and eosin staining of uterine cross sections at implantation site on GD 5.5 in *Wnk1<sup>+/+</sup>* and *Wnk1<sup>d/d</sup>* uteri, arrow indicates presence of maternal epithelium, and E = embryo. Scale bars = 100  $\mu$ m. (G) Implantation marker *Lif* mRNA expression in the uteri as determined by qRT-PCR on GD 3.5 and GD 4.5 for *Wnk1<sup>+/+</sup>* and *Wnk1<sup>d/d</sup>* mice. Results shown are mean  $\pm$  SD, \*  $p < 0.05$ . (H) Expression of proliferative marker Ki-67 and implantation marker PGR on GD 4.5 in the stroma and epithelium of *Wnk1<sup>+/+</sup>* and *Wnk1<sup>d/d</sup>* mice. LE = luminal epithelium and S = stroma, scale bars = 25  $\mu$ m.

1019

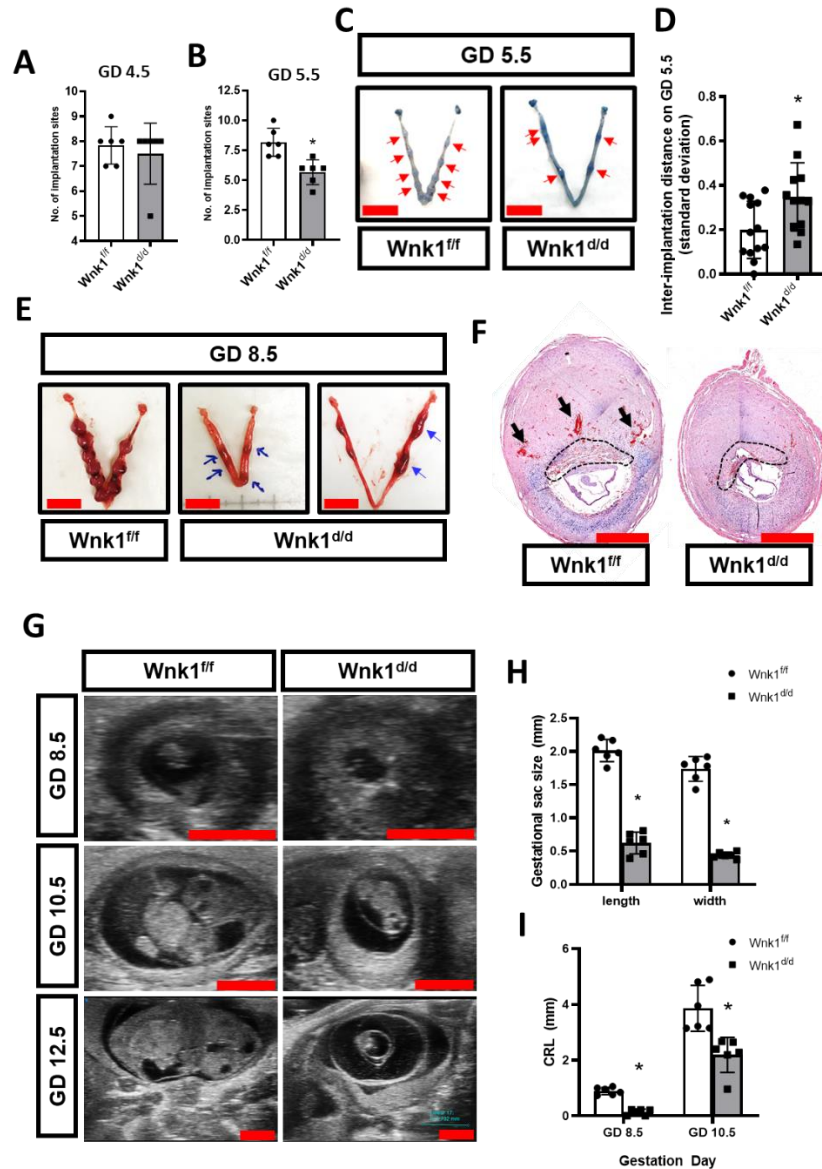

1020

1021 **Figure 4. Abnormal embryo development and increased resorption in *Wnk1<sup>d/d</sup>* mice.** (A – B)  
 1022 Number of implantation sites on GD 4.5 (A) and GD 5.5 (B) in *Wnk1<sup>fl/fl</sup>* and *Wnk1<sup>d/d</sup>* mice (n = 6).  
 1023 (C, E) Uterine gross morphology on GD 5.5 (C) and GD 8.5 (E), with implantation sites on GD 5.5  
 1024 marked by red arrows, and blue arrows indicate resorption and abnormal decidualization on GD  
 1025 8.5. Scale bars = 1 cm. (D) Comparison of the standard deviation of inter-implantation distance  
 1026 in *Wnk1<sup>fl/fl</sup>* and *Wnk1<sup>d/d</sup>* mice (n = ≥ 12 uterine horns, 7 mice per genotype). (F) Hematoxylin and  
 1027 eosin staining of cross section through the centre of decidual ball on GD 8.5 from *Wnk1<sup>fl/fl</sup>* and  
 1028 *Wnk1<sup>d/d</sup>* mice, with black arrows and dashed line indicating vascularization and placentation,  
 1029 respectively. Scale bars = 2 mm. (G) Ultrasound scans of uterus and embryo during mid-  
 1030 pregnancy at GD 8.5, 10.5 and 12.5. Scale bars = 2 mm. (H and I) Quantification of gestational  
 1031 sac size by length and width on GD 8.5 (H), and embryo size by crown-rump length (CRL) on GD  
 1032 8.5 and 10.5, as measured from ultrasound scans (I, n = 6). Results shown are mean ± SD, \* *p* <  
 1033 0.05.

1034

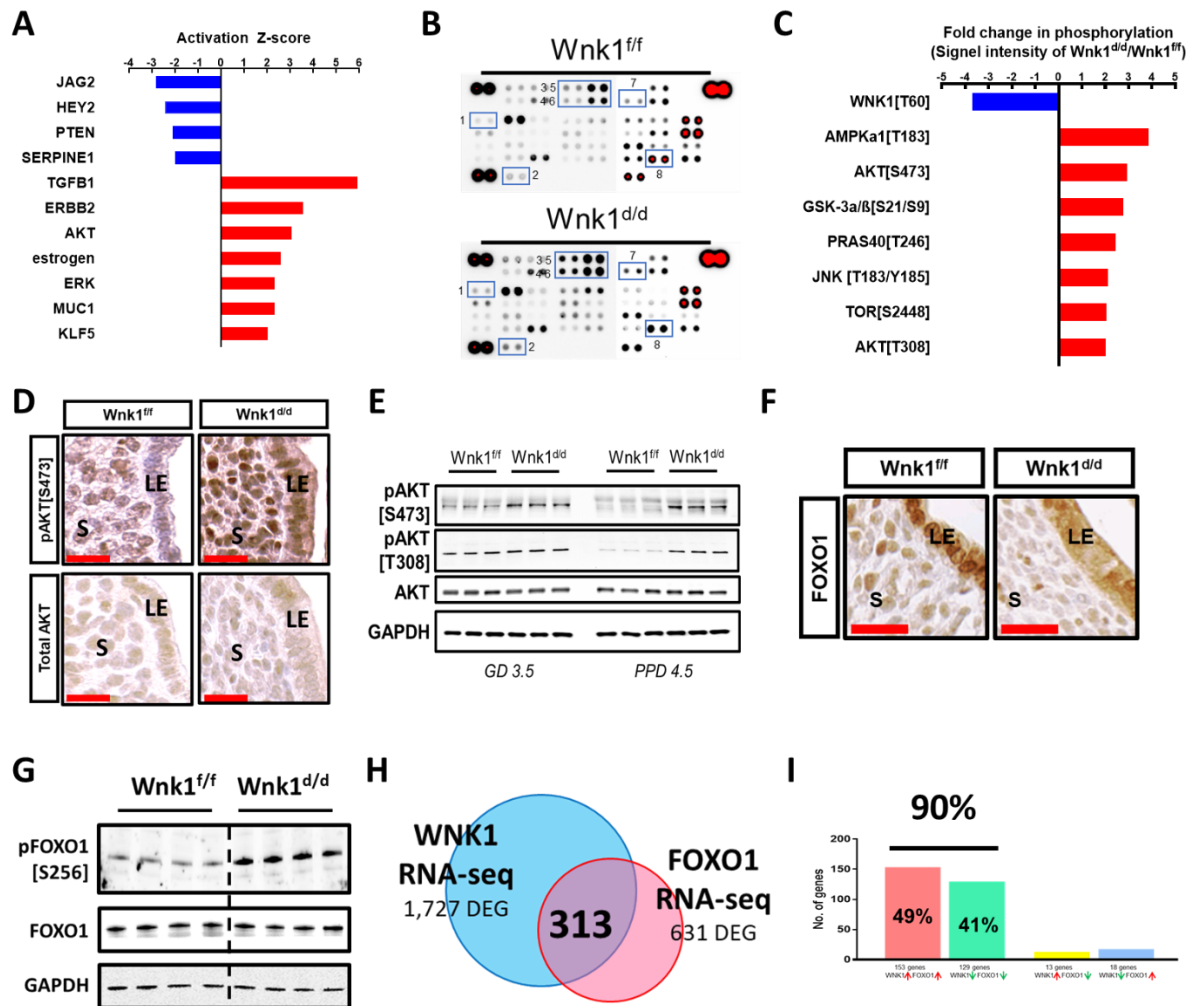

1035

1036

1037 **Figure 5. Loss of uterine WNK1 elevated AKT signaling.** (A) Activity of upstream regulators  
 1038 as predicted by Ingenuity Pathway Analysis (IPA) based on the altered uterine transcriptome of  
 1039 Wnk1<sup>d/d</sup> mice on PPD 4.5. See Table S4 for complete list. (B and C) Kinome phosphorylation  
 1040 status in Wnk1<sup>d/d</sup> and Wnk1<sup>ff/ff</sup> uteri on pseudopregnancy day (PPD) 4.5, with selected alterations  
 1041 shown in (C). All kinases with > 1.5 fold change in signal intensity as quantified by ImageJ is  
 1042 shown in Fig. S4. Results were acquired using pooled uterine lysate from 6 mice in each group.  
 1043 (D and E) Expression of phosphorylated and total AKT in Wnk1<sup>ff/ff</sup> and Wnk1<sup>d/d</sup> uteri on GD 4.5 as  
 1044 shown by immunohistochemistry ((D), LE = luminal epithelium and S = stroma), and on GD 3.5  
 1045 and PPD 4.5 as shown by Western blotting (E), scale bars = 25 μm. (F) Expression of AKT-  
 1046 regulated implantation marker FOXO1 on GD 4.5 in the stroma and epithelium of Wnk1<sup>ff/ff</sup> and  
 1047 Wnk1<sup>d/d</sup> mice. LE = luminal epithelium and S = stroma, scale bar = 25 μm. (G) Western blot  
 1048 analysis showing levels of phosphorylated and total FOXO1 in Wnk1<sup>ff/ff</sup> and Wnk1<sup>d/d</sup> uteri on PPD  
 1049 4.5. (H) Comparison of differentially expressed genes (DEGs) between the uteri of WNK1 ablated  
 1050 mice vs. their control littermates (1727 DEG; blue) and FOXO1 ablated mice vs. their control  
 1051 littermates (611 DEG; pink) identified 313 common genes. (I) Percentage of the 313 genes  
 1052 categorized into commonly upregulated (pink), commonly downregulated (green), or upregulated  
 1053 in one and downregulated in the other (yellow and blue).



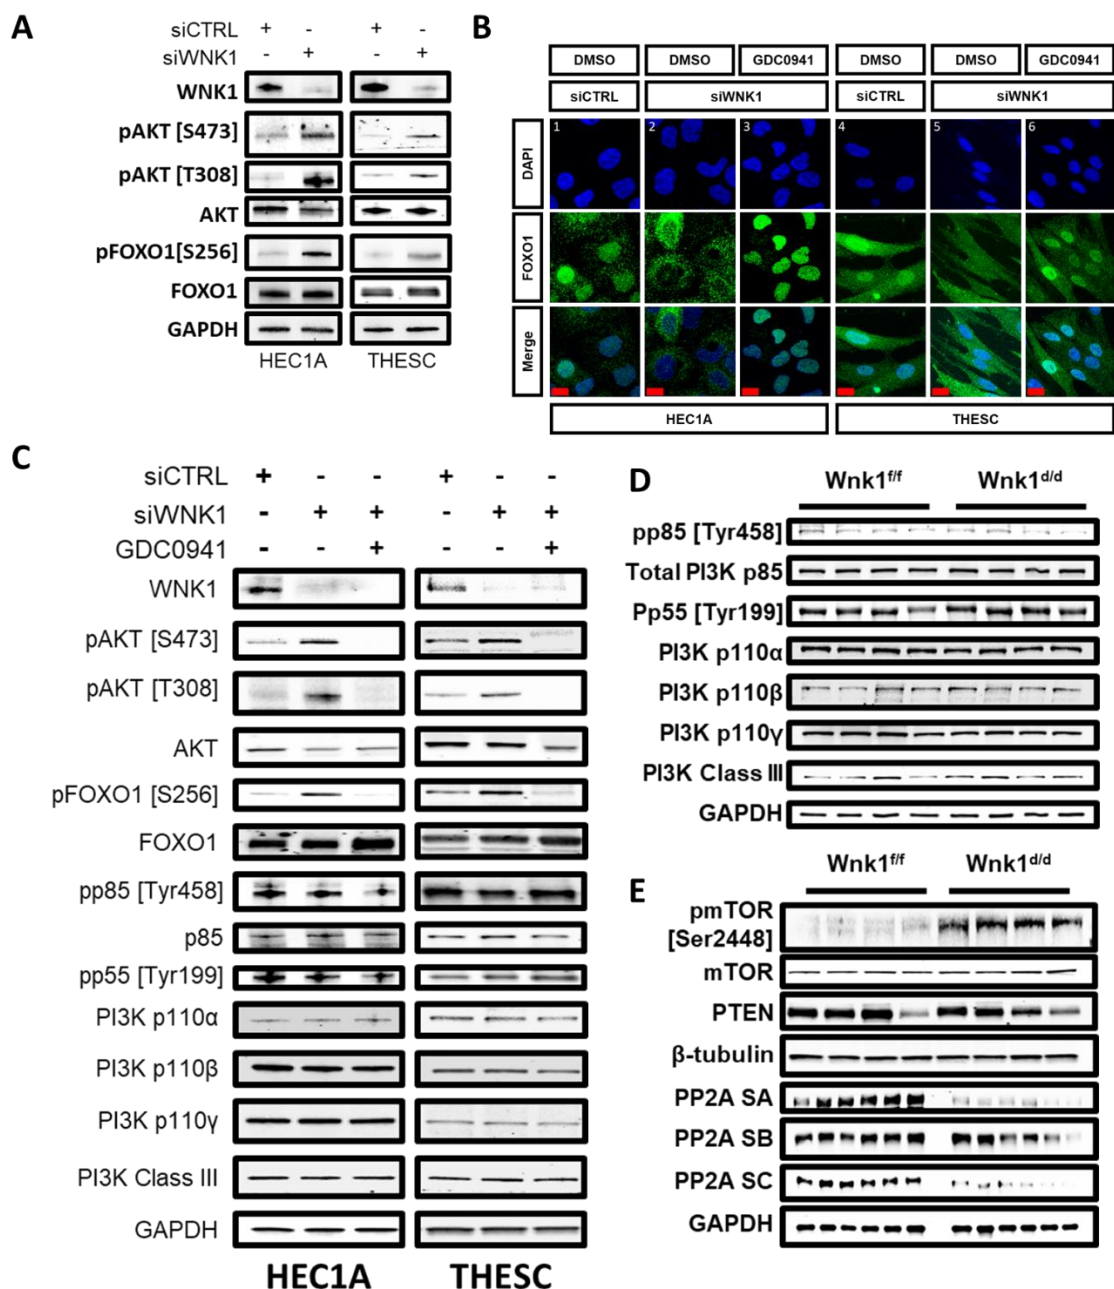

1054

1055

1056 **Figure 6. WNK1 ablation led to FOXO1 nuclear exclusion via AKT phosphorylation which**  
1057 **is associated with decreased PP2A phosphatase expression.** (A) Western blot showing levels  
1058 of phosphorylated and total AKT and FOXO1 in HEC1A and THESC cells transfected with 24 nM  
1059 siCTRL or siWNK1. (B) Immunofluorescence showing FOXO1 subcellular localization (green),  
1060 with nuclei presented in DAPI in HEC1A and THESC control cells (1, 4), siWNK1 transfected cells  
1061 (2, 5), and GDC0941 treated, siWNK1 transfected cells (3, 6), scale bars = 20 μm. (C) Expression  
1062 of FOXO1, AKT and PI3K members in HEC1A and THESC cells transfected with siCTRL,  
1063 siWNK1, and treated with AKT inhibitor GDC0941. (D and E) Expression of PI3K proteins (D),  
1064 and mTOR, PP2A subunits and PTEN (E) in Wnk1<sup>fl/fl</sup> and Wnk1<sup>d/d</sup> uteri on PPD 4.5.

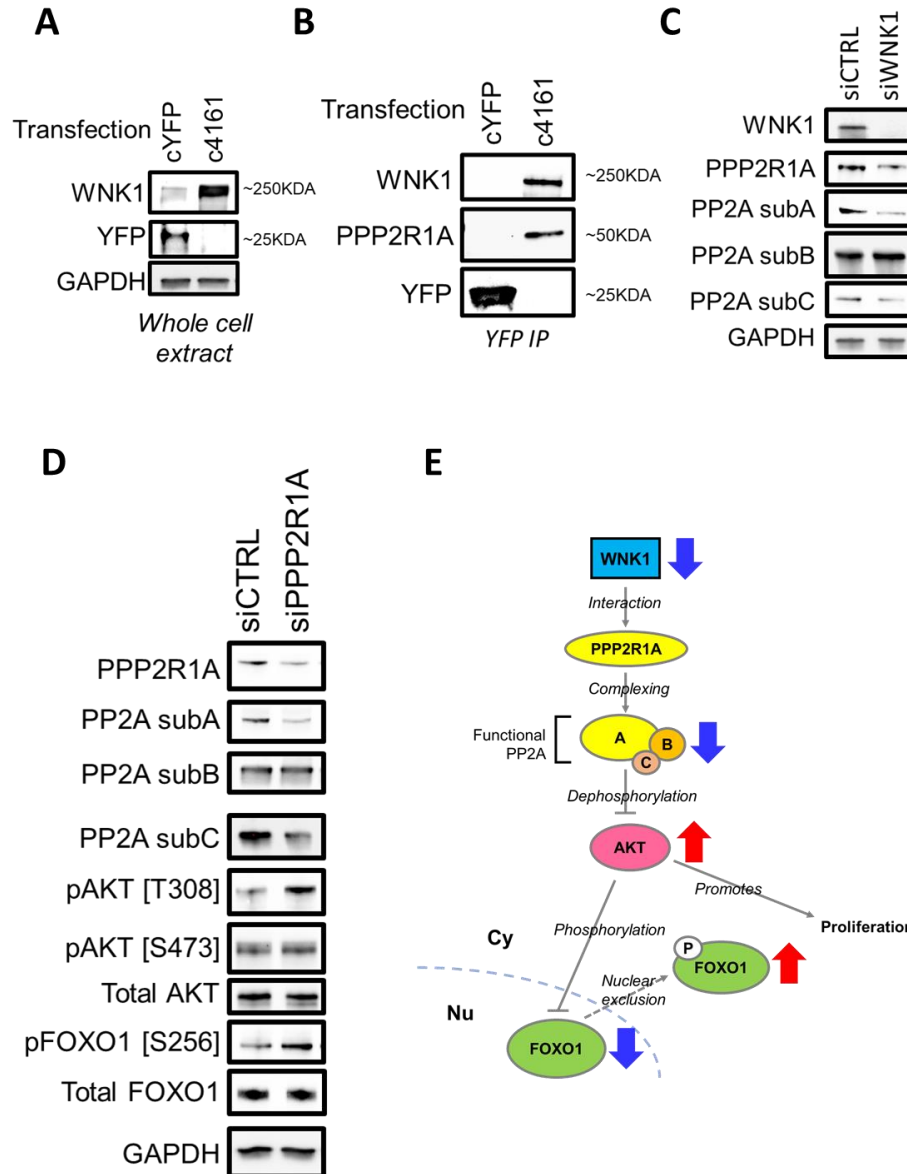

1065

1066

1067 **Figure 7. WNK1 regulates AKT signaling through direct interaction with PPP2R1A.** (A)  
 1068 WNK1 and YFP expression in HEC1A cells transfected the YFP expressing control plasmid  
 1069 (cYFP) or YFP-tagged WNK1 expression construct (c4161). (B) Co-immunoprecipitation of WNK1  
 1070 and PPP2R1A with YFP in HEC1A whole cell lysate, as indicated by western blotting. (C)  
 1071 Expression of PPP2R1A and PP2A subunits in HEC1A cells transfected with 24 nM siCTRL or  
 1072 siWNK1 for 72 hours. (D) Expression of PP2A subunits A, B and C, AKT and FOXO1 in HEC1A  
 1073 cells transfected with 72 nM siCTRL or siPPP2R1A for 72 hours. (E) Diagram illustrating the  
 1074 WNK1-PP2A-AKT-FOXO1 signaling axis. WNK1 physically interact with PPP2R1A, the alpha  
 1075 isoform of the scaffold subunit that forms the functional PP2A subunit. PP2A negatively regulates  
 1076 AKT, and AKT negatively regulates FOXO1 by phosphorylation and nuclear exclusion. AKT also  
 1077 promotes epithelial cell proliferation. As indicated by the blue and red arrows, decreased or loss  
 1078 of WNK1 will then lead to decreased PP2A activity, AKT hypersignaling and increased  
 1079 cytoplasmic FOXO1 retention and epithelial proliferation.

1080 **Supplemental Information Titles and Legends**

1081 **Figure S1. Generation of uterine WNK1 ablation mouse model.** (A) The  $Wnk1^{f/f}$  mice harbours  
1082 2 loxP sites (red block “L”) flanking the second exon of the *Wnk1* gene, which were crossed to  
1083 mice carrying Cre under the control of PGR promoter. Resultant  $PGR^{Cre/+}; Wnk1^{f/f}$  mice would  
1084 have exon2 excised from the genome in PGR expressing cells. (B and C) Decreased *Wnk1* gene  
1085 and WNK1 protein expression were confirmed using qPCR (B) and western blotting (C) of uterine  
1086 RNA or protein, respectively, results shown are mean  $\pm$  SD, \*  $p < 0.05$ .

1087

1088 **Figure S2. Delayed implantation in the  $Wnk1^{f/f}$  mice was not due to aberrant ovarian**  
1089 **function.** (A) Ovulation and fertilization was examined by inducing super-ovulation in the  $Wnk1^{f/f}$   
1090 and  $Wnk1^{d/d}$  mice, followed by mating to wild-type male mice. Number of 2-cell embryos were  
1091 quantified by oviductal flushing and counting under brightfield microscope. (B and C) Serum  
1092 progesterone (P4) and estradiol (E2) on GD 4.5 in  $Wnk1^{f/f}$  and  $Wnk1^{d/d}$  mice. Results shown are  
1093 mean  $\pm$  SD.

1094

1095 **Figure S3. Principle component analysis of uterine transcriptome (RNA-seq) during**  
1096 **receptivity from 4  $Wnk1^{f/f}$  mice (red) and 5  $Wnk1^{d/d}$  mice (blue).** Each dot represent uterine  
1097 tissues from one mouse, and was clustered based on the transcriptomic profile.

1098

1099 **Figure S4. Quantification and validation of the phosphokinase array.** (A) The phosphokinase  
1100 array was subjected to densitometrical quantification using ImageJ, and phosphokinases with  
1101 phosphorylation change ( $Wnk1^{d/d}$  density/ $Wnk1^{f/f}$  density) which exceeded 1.5 fold are shown. (B)

1102 Phosphorylation and total levels of AKT, GSK-3 $\alpha/\beta$ , and PRAS40 in the Wnk1<sup>ff</sup> and Wnk1<sup>dd</sup> uteri  
1103 on PPD 4.5 were assayed by Western blot, with each lane representing one mouse.

1104

1105 **Figure S5. mTOR is activated in the Wnk1<sup>dd</sup> uteri, but does not regulate AKT activity.** (A)  
1106 Rapamycin, an mTOR inhibitor was unable to reverse WNK1 ablation induced FOXO1 nuclear  
1107 exclusion, indicating that AKT activity is maintained. (B) Rapamycin treatment did not rescue  
1108 WNK1 ablation induced phosphorylation of AKT and FOXO1 in both HEC1A (left) and THESC  
1109 (right) cells. (C) Expression and phosphorylation of FOXO1 and AKT in HEC1A cells transfected  
1110 with siCTRL, siWNK1, simTOR, or both siWNKT and simTOR. Results showed no rescue of  
1111 FOXO1 and AKT phosphorylation by mTOR knock-down.

1112

1113 **Figure S6. WNK1 immunoprecipitation confirmation.** HEC1A cells were subjected to  
1114 immunoprecipitation (IP) using IgG (negative control) or WNK1 targeting antibody. The pulldown  
1115 lysate showed enrichment of WNK1 in the WNK1 IP, but not in the IgG (black arrow indicates  
1116 expected position of WNK1), as determined by western blotting.

1117

1118 **Fig. S7. Plasmid map of the WNK1 mammalian expression construct pcDNA-6.2-N-YFP-**  
1119 **WNK1 (c4161).**

1120

1121 **Table S1. Serum progesterone levels in Wnk1<sup>ff</sup> and Wnk1<sup>dd</sup> mice on PPD 4.5 to confirm**  
1122 **pseudopregnancy.**

1123



1124 **Table S2. List of differentially expressed genes in the *Wnk1<sup>d/d</sup>* uteri compared to *Wnk1<sup>ff</sup>***  
1125 **uteri on PPD 4.5.**

1126

1127 **Table S3. Functional annotation of altered transcriptome in *Wnk1<sup>d/d</sup>* uteri at PPD 4.5**  
1128 **(DAVID).**

1129

1130 **Table S4. List of upstream regulators with altered activities in *Wnk1<sup>d/d</sup>* uteri at PPD 4.5 (IPA).**

1131

1132 **Table S5. List of potential WNK1 interacting partners identified by WNK1 IP-MS.**

1133

1134 **Table S6. List of antibodies, sources, and experimental conditions used in this study.**

1135
